1  
2  
3  
4  
5  
6  
7  
8  
9  
10  
11  
12  
13  
14  
15  
16  
17  
18  
19  
20  
21  
22  
23  
24  
25  
26  
27  
28  
29  
30  
31  
32  
33  
34  
35  
36  
37  
38  
39  
40  
41  
42  
43  
44  
45  
46  
47  
48  
49  
50  
51  
52  
53  
54  
55  
56  
57  
58  
59  
60

1 **Title**

2 Effects of green manure application on soil microbial communities and activities in the  
3 decontaminated sandy soil paddy field in Fukushima, Japan

4  
5 **Authors**

6 Chol Gyu Lee<sup>1,2,3</sup>, Yuko Mitsuda<sup>4</sup>, Soh Sugihara<sup>2,4</sup>, Taiichiro Ookawa<sup>2,4</sup>, Haruo Tanaka<sup>4</sup>

7  
8 **Affiliations**

9 <sup>1</sup> Graduate School of Bio-Applications and Systems Engineering, Tokyo University of  
10 Agriculture and Technology, Koganei, Tokyo, 184-8588, Japan

11 <sup>2</sup> Institute of Global Innovation Research, Tokyo University of Agriculture and  
12 Technology, Fuchu, Tokyo, 183-8538, Japan

13 <sup>3</sup> Japan Collection of Microorganisms, RIKEN BioResource Research Center,  
14 Tsukuba, Ibaraki 305-0074, Japan

15 <sup>4</sup> Graduate School, Institute of Agriculture, Tokyo University of Agriculture and  
16 Technology, Fuchu, Tokyo, 183-8509, Japan

17 <sup>5</sup> Institute of Agriculture, Tokyo University of Agriculture and Technology, Fuchu,  
18 Tokyo, 183-8509, Japan

1  
2  
3  
4  
5  
6 19

7  
8  
9 20 **Corresponding author**

10  
11  
12 21 Haruo Tanaka

13  
14  
15 22 e-mail: [haruo@cc.tuat.ac.jp](mailto:haruo@cc.tuat.ac.jp) TEL/FAX: +81-42-367-5846  
16  
17  
18  
19  
20  
21  
22  
23  
24  
25  
26  
27  
28  
29  
30  
31  
32  
33  
34  
35  
36  
37  
38  
39  
40  
41  
42  
43  
44  
45  
46  
47  
48  
49  
50  
51  
52  
53  
54  
55  
56  
57  
58  
59  
60

For review

1  
2  
3  
4  
5  
6  
7  
8  
9  
10  
11  
12  
13  
14  
15  
16  
17  
18  
19  
20  
21  
22  
23  
24  
25  
26  
27  
28  
29  
30  
31  
32  
33  
34  
35  
36  
37  
38  
39  
40  
41  
42  
43  
44  
45  
46  
47  
48  
49  
50  
51  
52  
53  
54  
55  
56  
57  
58  
59  
60

23 **Abstract**

24 On March 11, 2011, Japan experienced an unprecedented earthquake off the Pacific  
25 coast of Tohoku, and suffered the direct and long-term effects of the earthquake and  
26 tsunami in the area. In Fukushima prefecture, agricultural land contaminated with  
27 radioactive Cesium from the Fukushima Daiichi Nuclear Power Plant. Therefore,  
28 surface soil were removed for decontamination, and low fertility sandy soil was covered.  
29 Organic matter input is necessary to increase soil organic matter and green manure  
30 application is an effective method to improve soil fertility in the paddy field. Soil  
31 microbes and enzyme activities are sensitively responded to organic matter addition, but  
32 their dynamics on the dressed field are not well investigated. In this study, we focused  
33 on changing the microbial community, diversity and enzyme activities along with the  
34 green manure decomposition process in the sandy soil dressed paddy field in Japan. The  
35 green manure of hairy vetch and oat were harvested and incorporated in May 2020 and  
36 their decomposition process as cellulose and hemicellulose contents were determined.  
37 Soil bacterial communities were analyzed using 16S amplicon sequencing. The green  
38 manure was rapidly decomposed within the first 13 days, and they did not remain 50  
39 days after green manure incorporation. Soil microbial biomass carbon was higher in the  
40 M treatment after GM treatment, but was not significant between treatments after 50

1  
2  
3  
4  
5  
6 41 days. Dehydrogenase and  $\beta$ -glucosidase activities changed during the harvesting period,  
7  
8  
9 42 but did not correlate with GM decomposition. Microbial diversity (OTU numbers and  
10  
11  
12 43 Shannon index) also changed with GM application, but they were not associated with  
13  
14  
15 44 GM decomposition. Soil prokaryotic communities and some bacteria (*Bacilli* and  
16  
17  
18 45 *Chloroflexi*) are significantly influenced by GM treatment. However, *Clostrida* was not  
19  
20  
21 46 affected by GM. Mixed green manure treatment showed significantly rapid  
22  
23  
24 47 hemicellulose decomposition than other treatments. In this process, *Anaerolineae* were  
25  
26  
27 48 negatively correlated with the decreasing of hemicellulose in this treatment. These  
28  
29  
30 49 results showed that GM treatment affected microbial communities, and their response  
31  
32  
33 50 was active during the decomposition process.  
34  
35

36 51

## 39 52 **Key words**

42 53 16S rRNA, Enzyme activity, Decontaminated soil, Mixing effect

45 54

## 48 55 **Introduction**

50 56 The Great East Japan Earthquake and tsunami on 11 March 2011, caused damage to  
51  
52 57 the Fukushima Daiichi Nuclear Power Plant (NPP), resulting in serious radioactive  
53  
54  
55 58 pollution throughout Eastern Japan. The radioactive fallout extensively polluted  
56  
57  
58 59 agricultural lands, including paddy fields, with radioactive Cs (MEXT 2011). The Cs

1  
2  
3  
4  
5  
6 60 contaminated agricultural soil were removed for depth 10cm, and the sandy soils with  
7  
8  
9 61 low soil carbon and nitrogen content (total carbon is 8.29 g kg soil<sup>-1</sup> and total nitrogen is  
10  
11  
12 62 0.74 g kg soil<sup>-1</sup>) were covered as decontamination. The decline of soil organic carbon  
13  
14  
15 63 negatively impacts crop productivity and sustainability of agriculture (Lal 2004;  
16  
17  
18 64 Agegnehu et al. 2016). Organic amendments can provide available nutrients for plants,  
19  
20  
21 65 and the coupling of carbon and nutrient transformation during organic matter  
22  
23  
24 66 decomposition strongly interacts with plant nutrient uptake (Kaye and Hart, 1997). The  
25  
26  
27 67 application of organic materials to rice fields for yield increase has a long history in  
28  
29  
30 68 Asian countries. Recent studies have focused on re-considering traditional fertilization  
31  
32  
33 69 practices to enhance soil organic input by amendments of crop residues, green manure,  
34  
35  
36 70 and farmyard manure (Liu et al. 2009). The most useful organic matter in the paddy  
37  
38  
39 71 field is rice straw. However, the rice yields in this decontaminated paddy field in  
40  
41  
42 72 Fukushima are less than half the average yield in Japan, therefore, not enough rice straw  
43  
44  
45 73 can be applied to increase soil fertility. Livestock wastes are another important organic  
46  
47  
48 74 amendment; however, the stock rising was not restarted yet in this area. The application  
49  
50  
51 75 of green manure (GM) to paddy fields is considered a good management practice  
52  
53  
54 76 (Zhang et al. 2017). GM application has been reported to increase soil organic matter,  
55  
56  
57  
58  
59  
60

1  
2  
3  
4  
5  
6 77 and fertility, and nutrient retention, reducing the occurrence of plant disease and long-  
7  
8  
9 78 term green manure incorporation increases rice yields (Gao et al. 2013; Li et al. 2019).  
10  
11  
12 79 Soil microbes play an important role in maintaining soil fertility and productivity and  
13  
14  
15 80 drive most soil processes, e.g. decomposition of organic materials, nutrient availability  
16  
17  
18 81 and retention, and soil organic matter sequestration (Coleman et al., 2004). Soils with  
19  
20  
21 82 high fertility generally possess larger microbial biomass, higher enzyme activities, and  
22  
23  
24 83 better soil structure than those with low fertility (Fontaine et al. 2011; Lang et al. 2012)  
25  
26  
27 84 could provide a suitable environment for substrate utilization by microbes. However,  
28  
29  
30 85 microbial communities, abundance, and their activities that respond to plant residue  
31  
32  
33 86 decomposition in the sandy soil are still limited. For recovering SOM in the covered  
34  
35  
36 87 sandy paddy field after decontamination in Fukushima, it is essential to investigate  
37  
38  
39 88 microbial response to SOM decomposition. It was reported that the mixing of different  
40  
41  
42 89 species of GM can effectively improve soil fertility than a single GM application  
43  
44  
45 90 (Fageria et al., 2005; Tosti et al., 2014). The mixtures of plant residue at rates faster  
46  
47  
48 91 than expected from the average of the decomposition rates of the plant types  
49  
50  
51 92 component. This phenomenon is termed the "mixing effect" and the hypotheses  
52  
53  
54 93 proposed to explain it include physical, chemical, and biological mechanisms. The aim  
55  
56  
57 94 of this study is to investigate the effects of GM application on soil enzyme activity and  
58  
59  
60

1  
2  
3  
4  
5  
6  
7  
8  
9  
10  
11  
12  
13  
14  
15  
16  
17  
18  
19  
20  
21  
22  
23  
24  
25  
26  
27  
28  
29  
30  
31  
32  
33  
34  
35  
36  
37  
38  
39  
40  
41  
42  
43  
44  
45  
46  
47  
48  
49  
50  
51  
52  
53  
54  
55  
56  
57  
58  
59  
60

95 microbial community during the GM decomposition process in sandy soil

96 decontaminated paddy fields in Fukushima Prefecture.

97

## 98 **Material and Methods**

### 99 **Sampling fields**

100 The paddy field was located in Tomioka town, Fukushima Prefecture, Japan (37°20'N,  
101 140°60'E). The fields are about 12km away from Fukushima 1st NPP. The soil was  
102 sandy loam soil (Fluvaquents) in the top 0.5 m, with 78.7 % sand, 17.7 % silt and 3.6 %  
103 clay. Soil physicochemical properties in the field were shown in Table 1. Two species  
104 of green manures were used, i.e., oat (A: *Avena strigosa* cv. Hayoats) and hairy vetch  
105 (V: *Vicia villosa* cv. Fujiemon). These species were sown as pure crops at an ordinary  
106 sowing rate (4 kg of hairy vetch and 15 kg oat each in 10a<sup>-1</sup>) and as a mixture with the  
107 same quantity (M: 4 kg of hairy vetch and 15 kg of oat 10a<sup>-1</sup>). Non-green manure  
108 treatment plots (control: C) were included in the experiments. The experimental design  
109 was a randomized complete block with three replicates. Each plot size was 225 m<sup>2</sup> (15  
110 m×15m). GM was cultivated from 1 November 2018 to 5 May 2019.

111

### 112 **Litterbag experiments**

1  
2  
3  
4  
5  
6 113 Each green manure was harvested from randomly selected 2 points (0.5m × 0.5m) in  
7  
8  
9 114 each treatment on 5 May. The yields and chemical properties of each GM were shown  
10  
11  
12 115 in Table 1. The GM dried at 70 °C and powdered. The litterbags (1mm mesh size) were  
13  
14  
15 116 filled with 30g of air-dried paddy field soil mixed with each GM. The amount of each  
16  
17  
18 117 GM input was equal to the amount of input carbon rate in the field (0.05 % of O and V  
19  
20  
21 118 treatment and 0.11% of M treatment) (Table 2). A total of 72 litterbags (4 treatment × 6  
22  
23  
24 119 sampling times × 3 replicants) were prepared. All litterbags were incorporated in each  
25  
26  
27 120 control plot of the paddy field on 30 May 2020. Within each plot, 24 litterbags (4  
28  
29  
30 121 treatments and 6 were incorporated into the soil by burying them at 15cm depth. Each  
31  
32  
33 122 litterbag from each plot was removed chronologically from 12 June (13 days), 3 July  
34  
35  
36 123 (34 days), 30 July (50 days), 21 August (72 days), and 4 October (116 days). One gram  
37  
38  
39 124 of soil in the litterbags were transported to the laboratory using an icebox and processed  
40  
41  
42 125 immediately after their removal from the field.  
43  
44  
45 126

### 47 127 **Soil chemical properties**

48  
49 128 Total carbon and nitrogen contents were measured with a NC analyzer (SUMIGRASH  
50  
51  
52 129 NC-80, Sumitomo Chemical Co. Ltd., Tokyo, Japan). Cellulose and hemicellulose  
53  
54  
55 130 content were determined with colormetric anthrone-sulfuric acid method (Koehler  
56  
57  
58 131 1952) after hydrololysis of component sugars by Oades et al. (1970). The cellulose and  
59  
60



1  
2  
3  
4  
5  
6 132 hemicellulose content of the control at that time was subtracted from each treatment

7  
8  
9 133 section to obtain the cellulose and hemicellulose content at that time. The content at the

10  
11  
12 134 time of treatment was set to 100, and the degradation rate was determined.

13  
14  
15  
16 135 **Soil biological properties**

17  
18  
19  
20 136 Soil enzyme activity was determined as below. Dehydrogenase activity was

21  
22  
23 137 determined with the reduction of idonitrotetrazolium chloride (INT) by Von Mersi and

24  
25  
26 138 Schinner (1991).  $\beta$ -glucosidase activities were assayed on the basis of p-Nitrophenyl- $\beta$ -

27  
28  
29 139 D-glucopyranoside (PNG) hydrolysis after cleavage of enzyme-specific synthetic

30  
31  
32 140 substrates by Hayano (1973). Microbial biomass carbon and nitrogen were determined

33  
34  
35 141 by chloroform fumigation-extraction method with 0.5 M  $K_2SO_4$  at 1:4 soil to extraction

36  
37  
38 142 ratio (Moore et al. 2000)

39  
40  
41  
42 143 **DNA extraction and microbial community analysis**

43  
44  
45 144 DNA was extracted from 0.5 g of soil using the ISOIL for bead beating kit (Nippon

46  
47  
48 145 Gene Co., Ltd., Tokyo, Japan), according to the manufacturer's instructions. DNA

49  
50  
51 146 quantification and integrity were measured using a NanoDrop spectrophotometer

52  
53  
54 147 (Thermo Fisher Scientific, Waltham, MA, USA) and gel visualization (0.8% agarose in

55  
56  
57 148 Tris/acetic acid/ethylenediaminetetraacetic acid buffer), respectively. The V4 region of

1  
2  
3  
4  
5  
6 149 the 16S rRNA gene of each sample was amplified by PCR using the bacterial and archaeal  
7  
8  
9 150 universal primers 515F (5'-GTGCCAGCMGCCGCGGTAA-3') and 806R (5'-GGAC-  
10  
11  
12 151 TACVSGGGTATCTAA-3') (Caporaso *et al.* 2011). A library was prepared by adaptor  
13  
14  
15 152 ligation with the PCR primer pairs using the TruSeq Nano DNA Library Prep Kit  
16  
17  
18 153 (Illumina, Inc., San Diego, CA, USA). When two or more bands were detected using  
19  
20  
21 154 1.5%-agarose gel electrophoresis, PCR products of approximately 300 bp in length were  
22  
23  
24 155 excised from the gel, non-specific amplicons were removed, and the products were  
25  
26  
27 156 purified using a MonoFas DNA purification kit for prokaryotes (GL Sciences, Inc., Tokyo,  
28  
29  
30 157 Japan). Each PCR amplicon was cleaned twice to remove the primers and short DNA  
31  
32  
33 158 fragments using the Agencourt AMPure XP system (Beckman Coulter, Inc., Brea, CA,  
34  
35  
36 159 USA) and quantified using a Qubit Fluorometer (Invitrogen Corporation, Carlsbad, CA,  
37  
38  
39 160 USA). The PCR products were adjusted to equimolar concentrations and subjected to  
40  
41  
42 161 unidirectional pyrosequencing, which was performed by Bioengineering Lab. Co., Ltd.  
43  
44  
45 162 (Kanagawa, Japan) using a MiSeq instrument (Illumina, Inc.). Overall, 3,521,651  
46  
47  
48 163 sequences were obtained from the 72 samples (Supplemental Table 1). Sequencing data  
49  
50  
51 164 were deposited in the DNA Database of Japan Sequence Read Archive under the  
52  
53  
54 165 accession number DRA006673.

55  
56  
57 166

58  
59 167 **Statistical analysis**  
60

1  
2  
3  
4  
5  
6 168 Illumina sequence data were sorted based on unique barcodes and quality-controlled  
7  
8  
9 169 using the Quantitative Insights Into Microbial Ecology Qiime2 (version 2017.8,  
10  
11  
12 170 <https://docs.qiime2.org/2017.8/>) with plugins demux (<https://github.com/qiime2/q2->  
13  
14  
15 171 demux), dada2 (Callahan et al., 2016) and feature-table (McDonald et al., 2012). Alpha  
16  
17  
18 172 and beta diversity analyses were performed by using plugins alignment (Kato and  
19  
20  
21 173 Standley, 2013), phylogeny (Price et al., 2010), diversity (<https://github.com/qiime2/q2->  
22  
23  
24 174 diversity), and emperor (Vazquez-Baeza et al., 2013). A pre-trained Naive Bayes  
25  
26  
27 175 classifier based on the Greengenes 13\_8 99% OTUs database ([http://greengenes.](http://greengenes)  
28  
29  
30 176 [secondgenome.com/](http://secondgenome.com/)), which has been trimmed to include the v4 re- gion of 16S rRNA  
31  
32  
33 177 gene, bound by the 515F/806R primer pair, was applied to paired-end sequence reads to  
34  
35  
36 178 generate taxonomy tables. Taxonomic and compositional analyses were conducted by  
37  
38  
39 179 using plu- gins feature-classifier (<https://github.com/qiime2/q2-feature->  
40  
41  
42 180 <https://github.com/qiime2/q2-taxa>) and composition (Mandal et al., 2015). The  
43  
44  
45 181 significant difference among each treatment was analyzed by Tukey-Kramer HSD  
46  
47  
48 182 method using R. Beta diversity was measured according to Bray–Curtis distances which  
49  
50  
51 183 were calculated by R, and displayed using Principal Coordinate Analysis (PCoA). The  
52  
53  
54 184 significance of grouping in the PCoA plot was tested by analysis of similarity  
55  
56  
57 185 (ANOSIM) in R with 999 permutations. The interacted factor between cellulose,  
58  
59  
60

1  
2  
3  
4  
5  
6 186 hemicellulose, and carbon decomposition and related microbes were analyzed using  
7  
8  
9 187 Spearman's rank correlation. The correlation coefficients (Rho value) less than -0.4  
10  
11  
12 188 were defined as negatively correlated microbes and more than 0.4 were defined as  
13  
14  
15 189 positively correlated microbes.  
16  
17  
18  
19  
20

190

## 191 **Results**

### 192 **The dynamics of GM content during the harvesting period**

193 GM, which mainly consists of cellulose and hemicellulose, was mainly degraded in 31  
194 days after GM treatment. At the 13 days, 56-72% of cellulose was decomposed, and the  
195 degradation rate did not differ among the treatments (Fig. 1). After 31 days, 5 to 14% of  
196 cellulose remained in all treatments and they remained unchanged through the  
197 harvesting period. Hemicellulose contents also decreased significantly over 13 days, but  
198 they differed among treatments: M treatment, a mixture of V and A treatment,  
199 decreased significantly (99%) compared to the other treatments (50% in V and 23% in  
200 A). Thereafter, the residues remained below 10% until day 116. In the V treatment, the  
201 rate of residues reached 33% on day 72, but they did not significantly differ from the  
202 other treatments. Total carbon and total nitrogen contents were gradually decreased in  
203 all treatments and the highest in M on 34 days after GM treatment (Figure 1). After 50  
59  
60

1  
2  
3  
4  
5  
6  
7  
8  
9  
10  
11  
12  
13  
14  
15  
16  
17  
18  
19  
20  
21  
22  
23  
24  
25  
26  
27  
28  
29  
30  
31  
32  
33  
34  
35  
36  
37  
38  
39  
40  
41  
42  
43  
44  
45  
46  
47  
48  
49  
50  
51  
52  
53  
54  
55  
56  
57  
58  
59  
60

204 days, TC and TN contents were similar among each GM treatment. Therefore, GM  
205 might be completely decomposed until this time. Total carbon content in each field was  
206 also changed during the harvesting stage, though they were not different between the  
207 treatments (Supplemental figure 1). After the rice harvesting, soil carbon and nitrogen  
208 content, cellulose, and hemicellulose were not different among the treatment (Table 3).

209

210 **Dynamics of microbial biomass, community structure, diversity, and enzyme**  
211 **activities response to GM application.**

212 Soil microbial biomass carbon was significantly increased in M treatment followed by  
213 A, V, and C treatment on 13 and 34 days after GM treatment (Figure 2). They  
214 significantly decreased and were not significantly different among the treatments after  
215 50 days. Dehydrogenase activities were increased 34 days after treatment, and they in A  
216 treatment showed the highest activities than other treatments. After 50days, the  
217 activities decreased and were not significantly different among the treatment. Beta-  
218 glucosidase activities were drastically changed during the harvesting stage; however,  
219 they were not significantly different among the treatments. Soil microbial diversity,  
220 OTU numbers and Shannon index, did not differ among treatments on days 13 and 34.  
221 They were the highest in M treatment compared to other treatments on 50 days and then

1  
2  
3  
4  
5  
6 222 decreased. On day 72 and 116, they in V treatment were higher than A treatment and M

7  
8  
9 223 treatment, respectively.

10  
11  
12 224 The main prokaryotic phyla in the field were Firmicutes and Proteobacteria (Figure 4).

13  
14  
15 225 They were occupied more than 50% in all treatments and sampling times. In class level,

16  
17  
18 226 Bacilli were the most dominant bacteria in all treatments followed by Clostridia,

19  
20  
21 227 Alphaproteobacteria, and unidentified Proteobacteria (Figure 5). The relative abundance

22  
23  
24 228 of *Bacilli* was decreased on day 31 compared with that on 13 days, then was again high

25  
26  
27 229 in the C and A treatments at day 50. Chloroflexi was higher in the M treatment than in

28  
29  
30 230 the V treatment at day 50; the relative abundance of *Clostridia* did not differ among

31  
32  
33 231 treatments (Figure 6). Soil prokaryotic communities were affected by GM treatment

34  
35  
36 232 (anosim  $p < 0.05$ ). PCoA analysis based on Bray-curtis analysis showed that

37  
38  
39 233 prokaryotic communities were roughly clustered by sampling times (Figure 7).

40  
41  
42 234 Prokaryotes sampled in 13 and 31 days were clustered by sampling times. But their

43  
44  
45 235 communities were not clustered in sampling time after 50 days. We analyzed the

46  
47  
48 236 microbes correlated between total carbon, hemicellulose, and cellulose contents (Table

49  
50  
51 237 4). *Lachnospiraceae* and *Clostridiales* belonged to Clostridia positively correlated to

52  
53  
54 238 cellulose and hemicellulose content, and *Bacillus* correlated to total carbon content.

55  
56  
57 239 Cellulose contents were negatively correlated ( $\rho < -0.4$ ) *Anaerolineae* SJA15 and

1  
2  
3  
4  
5  
6 240 unidentified Chloflexi belonged to Chloflexi, and *Rhizobiales* belonged to  
7  
8  
9 241 Alphaproteobacteria. Hemicellulose contents were negatively correlated to  
10  
11  
12 242 *Anaerolineae SJA15* and unidentified Chloflexi belonged to Chloflexi, unidentified  
13  
14  
15 243 betaproteobacteria, *Pedosphaera* belonged to Verrcomicrobia, *Chrolobi*, and  
16  
17  
18 244 *Methanomicrobia* belonged to Euryarchaeota. Total carbon was negatively correlated  
19  
20  
21 245 with *Ktedonobacteria* and unidentified Chloroflexi belonged to Chloroflexi, *Rhizobiales*  
22  
23  
24 246 belonged to Alphaproteobacteria, and *Chlorobi BSV26*. We compared the correlation  
25  
26  
27 247 between hemicellulose content and each microbe among the GM treatments (Table 5).  
28  
29  
30 248 *Bacillus* were positively correlated to hemicellulose content in all treatments, and  
31  
32  
33 249 *Lachnospiraceae* belonging to Clostridia positively correlated with E and M treatment.  
34  
35  
36 250 On the other hand, Anaerolineae were negatively correlated in A and E treatment,  
37  
38  
39 251 respectively, but not in M treatment. Some methanogen (*Methenomicrobia* and  
40  
41  
42 252 *Methanogulaceae*) were negatively correlated with hemicellulose content only in M  
43  
44  
45 253 treatment.  
46  
47  
48 254

## 255 **Discussion**

### 256 **Microbial communities and activities during GM decomposition process**

257 GM is used as a useful organic matter in the paddy field and it increases soil organic  
258 carbon and nitrogen (Lee et al. 2010; Hwang et al. 2015). Gao et al. (2016) reported that

1  
2  
3  
4  
5  
6 259 about 70% of wheat residue was mineralized under the anaerobic condition as well as  
7  
8  
9 260 aerobic condition in a Cambisol after 12-month in a field experiment. Zech et al. (1997)  
10  
11  
12 261 concluded that 30-45 % of plant residue carbon was accumulated in the soil after 1 year  
13  
14  
15 262 treated with various SOM conditions. In Japanese field, 67 to 79 % of carbon from rice  
16  
17  
18 263 residues was decomposed during one year (Shiga et al. 1985). On the other hand, in our  
19  
20  
21 264 fields, cellulose and hemicellulose were decomposed within 50 days and soil carbon  
22  
23  
24 265 was not accumulated after the rice harvesting period. The aboveground biomass of  
25  
26  
27 266 green manure (barley and hairy vetch) in past related studies ranges from 3.66 to 11 t  
28  
29  
30 267 ha<sup>-1</sup> and is incorporated into the field (Tosti et al. 2014; Jeon et al. 2008, Hwang et al.  
31  
32  
33 268 2015). However, in our field, only 1.24-2.55 t ha<sup>-1</sup> of GM was harvested due to the cold  
34  
35  
36 269 climate of Fukushima and low soil fertility of the covered sandy soil (Table 1). Another  
37  
38  
39 270 possibility of the rapid GM decomposition is the sandy textured soil property. Most  
40  
41  
42 271 sandy soils have low soil organic matter content and show low water holding capacity  
43  
44  
45 272 and high permeability due to their coarse texture (Rutkowska and Piķuła, 2013;  
46  
47  
48 273 Šimanský and Bajčan, 2014). Some studies showed that organic amendments generally  
49  
50  
51 274 decompose rapidly in sandy soils due to high temperatures and aeration (Glaser et al.,  
52  
53  
54 275 2002). Xu et al. (2019) showed that mineralization of residue carbon after 360 days of  
55  
56  
57 276 incubation was higher in low fertility soils than in high fertility soils. Low fertility soils  
58  
59  
60



1  
2  
3  
4  
5  
6  
7  
8  
9  
10  
11  
12  
13  
14  
15  
16  
17  
18  
19  
20  
21  
22  
23  
24  
25  
26  
27  
28  
29  
30  
31  
32  
33  
34  
35  
36  
37  
38  
39  
40  
41  
42  
43  
44  
45  
46  
47  
48  
49  
50  
51  
52  
53  
54  
55  
56  
57  
58  
59  
60

277 have a higher C/N ratio than high fertility soils. In this case, soil microorganisms that  
278 are deficient in nitrogen nutrients will use nitrogen derived from the residue pool, which  
279 is more easily decomposed, and will preferentially decompose plant residues to meet  
280 their nitrogen requirements. These two factors might contribute to the rapid degradation  
281 of GM.

282 Dehydrogenase is an intracellular enzyme that participates in oxidative  
283 phosphorylation in microorganisms and basically depends on the metabolic state of the  
284 soil microbes (Tabatabai et al. 1994; Insam, 2001).  $\beta$ -glucosidase is an extracellular  
285 enzyme that contributes to the degradation of cellulose and other  $\beta$ -1,4 glucans to  
286 glucose and is considered to be one of the proximate agents of organic matter  
287 decomposition (Sinsabaugh et al., 2008). Soil organic matter is the substrate for these  
288 soil enzymes, therefore, dehydrogenase and beta-glucosidase are positively correlated  
289 with soil organic matter (Bhattacharyya et al. 2012). However, in our study, each  
290 enzyme activity was not correlated with soil carbon, cellulose, and hemicellulose  
291 contents. Moreover, no microbes were correlated with each enzyme activity. The soil  
292 microbial biomass carbon in this study (13.4 to 87.4 mg C kg soil<sup>-1</sup>) was much lower  
293 than that in the previous study (more than 200 mg C kg soil<sup>-1</sup>) (Lu et al. 2002;  
294 Bhattacharyya et al. 2012; Zheng et al. 2016). Because the amount of green manure

1  
2  
3  
4  
5  
6 295 input was low, the small amount of enzymes may be secreted, and no difference was  
7  
8  
9 296 observed between the treatment. Moreover,  $\beta$ -glucosidase is an extracellular enzyme;  
10  
11  
12 297 therefore, it was leached from the outside of the litter bag in the flooded paddy field and  
13  
14  
15 298 contaminated each treatment.  
16  
17  
18 299 *Clostridia*, organic matter degradation bacteria under anaerobic conditions, is known to  
19  
20  
21 300 increase during the degradation process under flooded conditions (Weber and Conrad  
22  
23  
24 301 2001; Shrestha *et al.* 2011). Lee *et al.* (2017) showed that dried rice callus cells, a  
25  
26  
27 302 model of easily degradable plant residues, are mainly degraded by *Clostridia* under  
28  
29  
30 303 anaerobic conditions. In contrast, the abundance *Clostridia* did not change during the  
31  
32  
33 304 harvest period and was positively correlated with cellulose and hemicellulose content.  
34  
35  
36 305 *Bacillus*, the dominant aerobic bacteria in the field, was also significantly reduced  
37  
38  
39 306 during the harvest period. Soil condition might be anaerobic and it is favorable for  
40  
41  
42 307 *Clostridia* increasing. *Clostridia* and *Bacilli* are known for rapidly increasing bacteria  
43  
44  
45 308 response to organic matter addition (Bao *et al.* 2019). Therefore, it was suggested that  
46  
47  
48 309 they might be involved in the fast decomposition of GM and then they dominated.  
49  
50  
51 310 Thereafter, they could not grow because of low substrates. Compared with their  
52  
53  
54 311 decreasing, bacteria belonging to *Chloroflexi*, *Rhizobiales*, *Betaproteobacteria*, and  
55  
56  
57 312 *Chlorobi* BSV26 negatively correlated to soil carbon and plant cell wall content. They  
58  
59  
60

1  
2  
3  
4  
5  
6 313 are well-known oligotrophic bacteria (Fierer *et al.* 2007; Tian et al. 2015). They can  
7  
8  
9 314 grow in the low nutrient soil as oligotrophs, nitrogen-fixing, sulfate-reduction, and  
10  
11  
12 315 photosynthesis. In this study, there was no effect of GM treatment on carbon  
13  
14  
15 316 accumulation in soil. On the other hand, we revealed that the soil microbial community  
16  
17  
18 317 was affected by GM treatment. The microbial community associated with carbon from  
19  
20  
21 318 GM accumulation was also increased. In the future, the microbes involved in carbon  
22  
23  
24 319 sequestration and link it to the implementation of soil improvement and rice production  
25  
26  
27 320 in the covered field.  
28  
29

30 321

### 322 **Mixing effect on GM decomposition and microbial properties**

33  
34  
35  
36  
37 323 The types of GM also affected their decomposition rate. In general, plant residue  
38  
39  
40 324 decomposition is correlated with C/N ratio of each plant (). The combination of barley  
41  
42  
43 325 and hairy vetch optimizes the C/N ratio, which can favor the mineralization of organic  
44  
45  
46 326 substrates in soil (USDA, 2011). In this study, C/N ratio of V was 12 and that of E was  
47  
48  
49 327 61, therefore, we hypothesized the decomposition rate was  $V > M > E$ . Cellulose  
50  
51  
52 328 decomposition rates were not different among the treatment, while M treatment showed  
53  
54  
55 329 the highest hemicellulose decomposition rates compared with other treatments.  
56  
57  
58 330 Chapman and Koch et al. (2007) showed mixtures of plant litter decomposed up to 50%  
59  
60

1  
2  
3  
4  
5  
6 331 faster than expected decomposition speed and single litter types. Cuchietti et al (2014)  
7  
8  
9 332 explained that the fast-slow mixture decomposition rate is greater than expected due to  
10  
11  
12 333 the fast decomposing GM. In chemical aspects, the carbon limitation for decomposing  
13  
14  
15 334 fast decomposing plant residue and the slow decomposing plant residue it contains high  
16  
17  
18 335 CN ratio, will supply the carbon for carbon decomposition, therefore, decomposition  
19  
20  
21 336 will be accelerated. They indicated that fast-decomposing species would transfer  
22  
23  
24 337 nutrients to slow decomposing species, thereby increasing the decomposition rate of the  
25  
26  
27 338 slow decomposition species. Microbial communities also influence the mixing effect.  
28  
29  
30 339 Our results showed that microbes affected by hemicellulose decomposition in single and  
31  
32  
33 340 mixed treatment showed differently. Methanogens negatively correlated with  
34  
35  
36 341 hemicellulose content only in M treatment. They are faculty anaerobic, use H<sub>2</sub>/CO<sub>2</sub> and  
37  
38  
39 342 formate as a substrate for methanogenesis, and acetate is required for growth. The  
40  
41  
42 343 microbes involved in the mixing effect are not well studied. Our study provides some  
43  
44  
45 344 evidence that can shed light on some mechanisms of in the sandy soil environemnt, but  
46  
47  
48 345 on microbial and to the mechanisms proposed is critical.  
49  
50  
51  
52  
53 346  
54  
55 347 **Acknolwgement**  
56  
57  
58  
59  
60

1  
2  
3  
4  
5  
6 348 We thank Mr. Nobiru Watanabe for his supporting for management the paddy field. We also  
7  
8  
9 349 thank the members of Soil Science laboratory and crop production laboratory of Tokyo  
10  
11  
12 350 University of Agriculture and Technology for helping green manure sowing incorporating. This  
13  
14  
15 351 work was supported by the Fukushima Innovation Coast Framework Promotion Project and in  
16  
17  
18 352 part by the the Japan Society for Promotion of Science (JSPS) Grant-in-Aid for Scientific  
19  
20  
21 353 Research Grant Number 20H05583 (Post-Koch Ecology) and No.20H03113 (Scientific  
22  
23  
24 354 Research B).

25  
26  
27  
28 355

29  
30  
31 356

32  
33  
34 357 **Reference list**

35  
36  
37 358 Agegnehu, G., Bass, A. M., Nelson, P. N., and M. I. “Bird. 2016. “Benefits of biochar,  
38  
39  
40 359 compost and biochar-compost for soil quality, maize yield and greenhouse gas  
41  
42  
43 360 emissions in a tropical agricultural soil.” *Science of the Total Environment* 543:295–  
44  
45  
46 361 306. <https://doi.org/10.1016/j.scitotenv.2015.11.054>  
47  
48  
49 362 Bao, Y., J. Dolfing, B. Wang, R. Chen, M. Huang, Z. Li, Z. Lin, and Y. Feng. 2019.  
50  
51  
52 363 “Bacterial communities involved directly or indirectly in the anaerobic degradation  
53  
54  
55 364 of cellulose.” *Biology and Fertility of Soils* 55:201–211.  
56  
57  
58 365 <https://doi.org/10.1007/s00374-019-01342-1>  
59  
60

- 1  
2  
3  
4  
5  
6 366 Bhattacharyya, P., Roy, K., Neogi, S., Adhya, T., Rao, K., and M. Manna. 2012.  
7  
8  
9 367 “Effects of rice straw and nitrogen fertilization on greenhouse gas emissions and  
10  
11  
12 368 carbon storage in tropical flooded soil planted with rice.” *Soil & Tillage*  
13  
14  
15 369 *Research* 124:119-130. <https://doi.org/10.1016/j.still.2012.05.015>  
16  
17  
18 370 Caporaso JG, C. L. Lauber, W. A. Walters, D, Berg-Lyons, C. A. Lozupone, P. J.  
19  
20  
21 371 Turnbaugh, N. Fierer, and R. Knight. 2011 “Global patterns of 16S rRNA diversity  
22  
23  
24 372 at a depth of millions of sequences per sample.” *Proceedings of the Natural Academy*  
25  
26  
27 373 *of Sciences of the United States of America* 108, S4516–4522.  
28  
29  
30 374 <https://doi.org/10.1073/pnas.1000080107>  
31  
32  
33 375 Coleman, D.C., D. A. Crossley, and P. F. Hendrix. 2004. “Fundamentals of Soil  
34  
35  
36 376 Ecology.” Elsevier, New York. pp386  
37  
38  
39 377 Cuchietti, A., Marcotti, E., Gurvich, D. E., Cingolani, A. M., N. Pérez Harguindeguy.  
40  
41  
42 378 2014. “Leaf litter mixtures and neighbour effects: low-nitrogen and high-lignin  
43  
44  
45 379 species increase decomposition rate of high-nitrogen and low-lignin neighbours.”  
46  
47  
48 380 *Applied Soil Ecology* 82:44-51. <https://doi.org/10.1016/j.apsoil.2014.05.004>  
49  
50  
51 381 Chapman, S. K., and G. W. Koch. 2007. “What type of diversity yields synergy during  
52  
53  
54 382 mixed litter decomposition in a natural forest ecosystem?” *Plant and Soil* 299 (1):  
55  
56  
57 383 153–162. <https://doi.org/10.1007/s11104-007-9372-8>  
58  
59  
60

- 1  
2  
3  
4  
5  
6 384 Callahan, B. J., P. J. McMurdie, M. J. Rosen, A. W. Han, A. J. A. Johnson, and S. P.  
7  
8  
9 385 Holmes. 2016. “DADA2: High-resolution sample inference from Illumina amplicon  
10  
11  
12 386 data.” *Nature Methods* 13: 581–583. <https://doi.org/10.1038/nmeth.3869>  
13  
14  
15 387 Fageria, N.K., V. C. Baligar and B. A. Bailey. 2005. “Role of cover crops in improving  
16  
17  
18 388 soil and row crop productivity”. *Communications in Soil Science and Plant Analysis*  
19  
20  
21 389 36, 2733–2757. <https://doi.org/10.1080/00103620500303939>  
22  
23  
24 390 Fierer, N., M. A. Bradford, R. B. Jackson 2007. “Toward an ecological classification of  
25  
26  
27 391 soil bacteria.” *Ecology* 88:1354–1364. <https://doi.org/10.1890/05-1839>  
28  
29  
30 392 Fontaine S, C, Henault, A, Aamor, N, Bdioui, J. M. G. Bloor, V. Maire, B. Mary, S.  
31  
32  
33 393 Revaillet, P. A. Maron. 2011. “Fungi mediate long term sequestration of carbon and  
34  
35  
36 394 nitrogen in soil through their priming effect.” *Soil Biology & Biochemistry* 43:86–96.  
37  
38  
39 395 <https://doi.org/10.1016/j.soilbio.2010.09.017>  
40  
41  
42 396 Gao, J.S., M.G. Xu, C.H. Dong, J. Huang, W.D. Cao, X.B. Zeng, S.L. Wen, and J. Nie.  
43  
44  
45 397 2013. “Effects of long-term rice-rice-green manure cropping rotation on rice yield  
46  
47  
48 398 and soil fertility.” *Acta Agronomica Sinica* 39: 343.  
49  
50  
51 399 <https://doi.org/10.1100/2012/279641>  
52  
53  
54 400 Gao, H., X., Chen. J., Wei, Y., Zhang, L., Zhang, J., Chang, and M. L. Thompson.  
55  
56  
57 401 2016. “Decomposition dynamics and changes in chemical composition of wheat  
58  
59  
60

- 1  
2  
3  
4  
5  
6 402 straw residue under anaerobic and aerobic conditions.” *PLoS One* 11:e0158172.  
7  
8  
9 403 <https://doi.org/10.1371/journal.pone.0158172>  
10  
11  
12 404 Glaser, B., J., Lehmann, and W. Zech. 2002. “Ameliorating physical and chemical  
13  
14  
15 405 properties of highly weathered soils in the tropics with charcoal—a review.” *Biology*  
16  
17  
18 406 *and Fertility of Soils* 35: 219–230. <https://doi.org/10.1007/s00374-002-0466-4>.  
19  
20  
21 407 Gong, Z., N., Deng, Q., Song, and Z., Li. 2018. “Decompositng characteristics of maize  
22  
23  
24 408 straw returning in Songnen plain in long-term located experiment.” *Transactions of*  
25  
26  
27 409 *the Chinese Society of Agricultural. Engineering* 34: 139–145.  
28  
29  
30 410 <https://doi.org/10.1007/s10705-019-09999-8>  
31  
32  
33 411 Hayano. K. 1973. “A method for the determination of  $\beta$ -glucosidase activity in soil.”  
34  
35  
36 412 *Soil Science and Plant Nutrition* 19(2): 103-108.  
37  
38  
39 413 <https://doi.org/10.1080/00380768.1973.10432524>  
40  
41  
42 414 Hwang, H. Y., G. W. Kim. Y. B. Lee, P. J. Kim, and S.Y. Kim. 2015. “Improvement of  
43  
44  
45 415 the value of green manure via mixed hairy vetch and barley cultivation in temperate  
46  
47  
48 416 paddy soil.” *Field Crops Research*, 183: 138-146.  
49  
50  
51 417 <https://doi.org/10.1016/j.fcr.2015.08.001>  
52  
53  
54 418 Insam, H. 2001. “Developments in soil microbiology since the mid 1960's.”  
55  
56  
57 419 *Geoderma* 100, 389-402. [https://doi.org/10.1016/S0016-7061\(01\)00029-5](https://doi.org/10.1016/S0016-7061(01)00029-5)  
58  
59  
60



- 1  
2  
3  
4  
5  
6 420 Jeon, W.T., M. T. Kim, K. Y. Seong, and I.S. Oh. 2008. "Changes of soil properties and  
7  
8  
9 421 temperature by green manure under rice-based cropping system." *Korean Journal of Crop*  
10  
11  
12 422 *Science* 53: 413-416.  
13  
14  
15 423 Katoh, K., and D.M. Standley. 2013. "MAFFT multiple sequence alignment software  
16  
17  
18 424 version 7: improvements in performance and usability." *Molecular Biology of*  
19  
20  
21 425 *Evolution*. 30: 772–780. <https://doi.org/10.1093/molbev/mst010>  
22  
23  
24 426 Kaye, J.P., and S. C. Hart. 1997. "Competition for nitrogen between plants and soil  
25  
26  
27 427 microorganisms." *Trends in Ecology & Evolution*. 12: 139–143.  
28  
29  
30 428 [https://doi.org/10.1016/S0169-5347\(97\)01001-X](https://doi.org/10.1016/S0169-5347(97)01001-X)  
31  
32  
33 429 Koehler, L. H. 1952. "Differentiation of carbohydrates by anthrone reaction rate and  
34  
35  
36 430 color intensity." *Analytical Chemistry* 24(10): 1576-1579.  
37  
38  
39 431 Lal, R. 2004. "Soil carbon sequestration impacts on global climate change and food  
40  
41  
42 432 security." *Science* 304:1623–1627. <https://doi.org/10.1126/science.1097396>  
43  
44  
45 433 Lang J, J. Hu, R. Wei, Y. Xu, and Q. Shen. 2012. "Control of cotton Verticillium wilt  
46  
47  
48 434 and fungal diversity of rhizosphere soils by bio-organic fertilizer." *Biology and*  
49  
50  
51 435 *Fertility of Soils* 48:191–203. <https://doi.org/10.1007/s00374-011-0617-6>  
52  
53  
54 436 Lee, C.H., K. Do Park, K. Y. Jung, M. A. Ali, D. Lee, J. Gutierrez, and P. J. Kim. 2010.  
55  
56  
57 437 "Effect of Chinese milk vetch (*Astragalus sinicus* L.) as a green manure on rice  
58  
59  
60

- 1  
2  
3  
4  
5  
6 438 productivity and methane emission in paddy soil.” *Agriculture Ecosystem &*  
7  
8  
9 439 *Environment* 138: 343–347. <https://doi.org/10.1016/j.agee.2010.05.011>  
10  
11  
12 440 Lee, C. G., T. Watanabe, and S. Asakawa. 2017. “Bacterial community incorporating  
13  
14  
15 441 carbon derived from plant residue in an anoxic non-rhizosphere soil estimated by  
16  
17  
18 442 DNA-SIP analysis.” *Journal of Soils and Sediment* 17: 1084–1091.  
19  
20  
21 443 <https://doi.org/10.1007/s11368-016-1621-0>  
22  
23  
24 444 Li, T., J. Gao, L. Bai, Y. Wang, J. Huang, M. Kumar, and X. Zeng. 2019. “Influence of  
25  
26  
27 445 green manure and rice straw management on soil organic carbon, enzyme activities,  
28  
29  
30 446 and rice yield in red paddy soil.” *Soil & Tillage Research* 195:104428.  
31  
32  
33 447 <https://doi.org/10.1016/j.still.2019.104428>  
34  
35  
36 448 Liu, M. F. Hu, X. Chen, Q. Huang, J. Jiao, B. Zhang, and H. Li. 2009. “Organic  
37  
38  
39 449 amendments with reduced chemical fertilizer promote soil microbial development  
40  
41  
42 450 and nutrient availability in a subtropical paddy field: The influence of quantity, type  
43  
44  
45 451 and application time of organic amendments.” *Applied Soil Ecology* 42: 166-175.  
46  
47  
48 452 <https://doi.org/10.1016/j.apsoil.2009.03.006>  
49  
50  
51 453 Lu, Y., A. Watanabe, and M. Kimura. 2002. “Contribution of plant-derived carbon to  
52  
53  
54 454 soil microbial biomass dynamics in a paddy rice microcosm.” *Biology and Fertility*  
55  
56  
57 455 *of Soils* 36, 136–142. <https://doi.org/10.1007/s00374-002-0504-2>  
58  
59  
60

- 1  
2  
3  
4  
5  
6 456 Mandal, S., W. Van Treuren, R. A. White, M. Eggesbo, R. Knight, and S. D. Peddada.  
7  
8  
9 457 2015. "Analysis of composition of microbiomes: a novel method for studying  
10  
11  
12 458 microbial composition." *Microbial Ecology in Health and Disease* 26: 27663.  
13  
14  
15 459 <http://dx.doi.org/10.3402/mehd.v26.27663>  
16  
17  
18 460 McDonald, D., M. Price, J. Goodrich, E. P. Nawrocki, T. Z. DeSantis, A. Probst, G. L.  
19  
20  
21 461 Andersen, R. Knight, and P. Hugenholtz. 2012. "An improved Greengenes taxonomy  
22  
23  
24 462 with explicit ranks for ecological and evolutionary analyses of bacteria and  
25  
26  
27 463 archaea." *The ISME Journal* 6: 610–618. <https://doi.org/10.1038/ismej.2011.139>  
28  
29  
30 464 Ministry of Education, Culture, Sports, Science and Technology, Japan (MEXT) 2011.  
31  
32  
33 465 Monitoring information of environmental radioactivity level. Available from URL:  
34  
35  
36 466 <http://radioactivity.mext.go.jp/en/> [cited 17 December 2016].  
37  
38  
39 467 Moore, J., S. Klose, and M. Tabatabai. 2000. "Soil microbial biomass carbon and  
40  
41  
42 468 nitrogen as affected by cropping systems. *Biology and Fertility of Soils* 31, 200–210.  
43  
44  
45 469 <https://doi.org/10.1007/s003740050646>  
46  
47  
48 470 Oades, J.M., M. A. Kirkman, and G. H. Wagner. "1970. The use of gas-liquid  
49  
50  
51 471 chromatography for the determination of sugars extracted from soils by sulfuric  
52  
53  
54 472 acid." *Soil Science Society of American Proceeding* 34(2): 230-235.  
55  
56  
57 473 <https://doi.org/10.2136/sssaj1970.03615995003400020017x>  
58  
59  
60

- 1  
2  
3  
4  
5  
6  
7 474 Price, M.N., P. S. Dehal, and A. P. Arkin. 2010. “FastTree 2—approximately  
8  
9 475 maximum-like-lihood trees for large alignments.” *PLoS One* 5, e9490.  
10  
11  
12 476 <https://doi.org/10.1371/journal.pone.0009490>  
13  
14  
15 477 Rutkowska, A., and D. Piłkuła. 2013. Effect of crop rotation and nitrogen fertilization on  
16  
17  
18 478 the quality and quantity of soil organic matter M.C. Hernandez Soriano (Ed.), *Soil*  
19  
20  
21 479 *Processes and Current Trends in Quality Assessment* 249-267  
22  
23  
24 480 Shiga, H., N. Ouyama, K. Maeda, M. Suzuki. 1985. “An evaluation of different organic  
25  
26  
27 481 materials based on their decomposition patterns in paddy soils.” *Bulletin of the*  
28  
29  
30 482 *National Agriculture Research Center* 5:1–19 (in Japanese).  
31  
32  
33 483 Shrestha, M., P. M. Shrestha, and R. Conrad. 2011. “Bacterial and archaeal com-  
34  
35  
36 484 munities involved in the *in situ* degradation of <sup>13</sup>C-labelled straw in the rice  
37  
38  
39 485 rhizosphere.” *Environmental Microbiology Reports* 3:587–596.  
40  
41  
42 486 <https://doi.org/10.1111/j.1758-2229.2011.00267.x>  
43  
44  
45 487 Sinsabaugh, R.L., C.L. Lauber, M. N. Weintraub, B. Ahmed, S. D. Allison, C.  
46  
47  
48 488 Crenshaw, A. R. Contosta, D. Cusack, S. Frey, M. E. Gallo, T. B. Gartner, S. E.  
49  
50  
51 489 Hobbie, K. Holland, B. L. Keeler, J. S. Powers, M. Stursova, C. Takacs-Vesbach, M.  
52  
53  
54 490 P. Waldrop, M. D. Wallenstein, D. R. Zak, and L. H. Zeglin. 2008. “Stoichiometry of  
55  
56  
57  
58  
59  
60

- 1  
2  
3  
4  
5  
6 491 soil enzyme activity at global scale.” *Ecology Letters* 11:1252–1264.  
7  
8  
9 492 <https://doi.org/10.1111/j.1461-0248.2008.01245.x>  
10  
11  
12 493 Tabatabai, M. A. 1994. Enzymes  
13  
14  
15 494 R.W. Weaver, S Augle, P.J. Bottomly, D. Bezdicek, S. Smith, A. Tabatabai, A. Woll  
16  
17  
18 495 um (Eds.), *Methods of soil analysis. Part 2. Microbiological and biochemical*  
19  
20  
21 496 properties, No. 5, Soil Science Society of America, Madison. 775-833.  
22  
23  
24 497 <https://doi.org/10.2136/sssabookser5.2.c37>  
25  
26  
27 498 Tian, W., L. Wang, Y. Li, K. Zhuang, G. Li, J. Zhang, X. Xiao, and Y. Xi. 2015  
28  
29  
30 499 “Responses of microbial activity, abundance, and community in wheat soil after three  
31  
32  
33 500 years of heavy fertilization with manure- based compost and inorganic nitrogen.”  
34  
35  
36 501 *Agriculture Ecosystem & Environment* 213:219–227.  
37  
38  
39 502 <https://doi:10.1016/j.agee.2015.08.009>  
40  
41  
42 503 Tosti, G., P. Benincasa, M. Farneselli, F. Tei, and M. Guiducci. 2014. “Barley–hairy  
43  
44  
45 504 vetch mixture as cover crop for green manuring and the mitigation of N leaching  
46  
47  
48 505 risk.” *European Journal of Agronomy* 54:34–39.  
49  
50  
51 506 <https://doi.org/10.1016/j.eja.2013.11.012>  
52  
53  
54 507 Vazquez-Baeza, Y., M. Pirrung, A. Gonzalez, and R. Knight. 2013. “EMPeror: a tool for  
55  
56  
57 508 visualizing high-throughput microbial community data.” *Gigascience* 2:16.  
58  
59  
60

- 1  
2  
3  
4  
5  
6 509 <https://doi.org/10.1186/2047-217X-2-16>
- 7  
8  
9 510 Von Mersi, W. and Schinner, F. 1991. "An improved and accurate method for  
11  
12 511 determining the dehydrogenase activity of soils with iodonitrotetrazorium chloride."  
13  
14 512 *Biology and Fertility of Soils* 11:216-220. <https://doi.org/10.1007/BF00335770>
- 15  
16  
17  
18 513 Weber, S., S. Stubner, and R. Conrad. 2001. "Bacterial populations colonizing and  
19  
20  
21 514 degrading rice straw in anoxic paddy soil." *Applied Environmental Microbiology*  
22  
23  
24 515 67:1318–1327. <https://doi.org/10.1128/AEM.67.3.1318-1327.2001>
- 25  
26  
27 516 Xu, Y., F. Ding, X. Gao, Y. Wang, M. Li, and J. Wang. 2019. "Mineralization of plant  
28  
29  
30 517 residues and native soil carbon as affected by soil fertility and residue type." *Journal*  
31  
32  
33 518 *of Soils and Sediments* 19:1407-1415. <https://doi.org/10.1007/s11368-018-2152-7>
- 34  
35  
36 519 Zech, W., N. Senesi, G. Guggenberger, K. Kaiser, J. Lehmann, T. M. Miano, A.  
37  
38  
39 520 Miltner, and G. Schroth. 1997 "Factors controlling humification and mineralization  
40  
41  
42 521 of soil organic matter in the tropics." *Geoderma* 79:117–  
43  
44  
45 522 161. [https://doi.org/10.1016/S0016-7061\(97\)00040-2](https://doi.org/10.1016/S0016-7061(97)00040-2)
- 46  
47  
48 523 Zhang, X., R. Zhang, J. Gao, X. Wang, F. Fan, X. Ma, H. Yin, C. Zhang, K. Feng, and  
49  
50  
51 524 Y. Deng. 2017. "Thirty-one years of rice-rice-green manure rotations shape the  
52  
53  
54 525 rhizosphere microbial community and enrich beneficial bacteria." *Soil Biology &*  
55  
56  
57 526 *Biochemistry* 104:208–217. <https://doi.org/10.1016/j.soilbio.2016.10.023>  
58  
59  
60

1  
2  
3  
4  
5  
6  
7  
8  
9  
10  
11  
12  
13  
14  
15  
16  
17  
18  
19  
20  
21  
22  
23  
24  
25  
26  
27  
28  
29  
30  
31  
32  
33  
34  
35  
36  
37  
38  
39  
40  
41  
42  
43  
44  
45  
46  
47  
48  
49  
50  
51  
52  
53  
54  
55  
56  
57  
58  
59  
60

527 Zheng J, J. Chen, G. Pan, X. Liu, X. Zhang, L. Li, R. Bian, K. Cheng, and Z. Jinwei.  
528 2016. "Biochar decreased microbial metabolic quotient and shifted community  
529 composition four years after a single incorporation in a slightly acid rice paddy from  
530 southwest China." *Science of the Total Environment* 15:571:206-17.  
531 <https://doi.org/10.1016/j.scitotenv.2016.07.135>.  
532

For review

1  
2  
3  
4  
5  
6 534 **Figure legends**

7  
8  
9 535

10  
11  
12 536 **Figure 1. Dynamics of cellulose, hemicellulose, total carbon and nitrogen contents in**  
13  
14  
15 537 **each treatment during the harvesting period**

16  
17  
18 538 Error bars indicate standard deviations. Statistically significant treatments in each  
19  
20  
21 539 sampling days are indicated by alphabetic labels (Tukey HSD analysis,  $p < 0.05$ ).

22  
23  
24 540

25  
26  
27 541 **Figure 2. Dynamics of microbial biomass, and each enzyme activity during the**  
28  
29  
30 542 **harvesting period**

31  
32  
33 543 Error bars indicate standard deviations. Statistically significant treatments in each  
34  
35  
36 544 sampling days are indicated by alphabetic labels (Tukey HSD analysis,  $p < 0.05$ ).

37  
38  
39 545

40  
41  
42 546 **Figure 3. Dynamics of microbial diversity and richness during the harvesting**  
43  
44  
45 547 **period**

46  
47  
48 548 Error bars indicate standard deviations. Error bars Statistically significant treatments in  
49  
50  
51 549 each sampling days are indicated by alphabetic labels (Tukey HSD analysis,  $p < 0.05$ ).

52  
53  
54 550



1  
2  
3  
4  
5  
6 551 **Figure 4. Changing the relative abundance of prokayoric communities during the**

7  
8  
9 552 **harvesting period in genus level**

10  
11  
12 553 The date indicated the sampling days and the alphabet at the bottom indicated each

13  
14  
15 554 treatment.

16  
17  
18 555

19  
20  
21 556 **Figure 5. Changing the relative abundance of prokayoric communities during the**

22  
23  
24 557 **harvesting period in order level**

25  
26  
27 558 The date indicated the sampling days and the alphabet at the bottom indicated each

28  
29  
30 559 treatment.

31  
32  
33 560

34  
35  
36 561 **Figure 6. Dynamics of each microbes during the harvesting period**

37  
38  
39 562 Error bars indicate standard deviations. Statistically significant treatments in each

40  
41  
42 563 sampling days are indicated by alphabetic labels (Tukey HSD analysis,  $p < 0.05$ ).

43  
44  
45 564

46  
47  
48 565 **Figure 7. Beta diversity: principal coordinate analysis (PCoA) of prokaryotic**

49  
50  
51 566 **community structure based on Buray–Curtis distances for each treatments during**

52  
53  
54 567 **the harvesting period.**

1  
2  
3  
4  
5  
6 568 Sample names were assigned x/y-z in which x, y and z indicate the date of sampling and  
7  
8  
9 569 replication number, respectively (ex, 6/12-1 was sampled at 12 June and the replication 1).

10  
11  
12 570  
13  
14  
15  
16  
17  
18  
19  
20  
21  
22  
23  
24  
25  
26  
27  
28  
29  
30  
31  
32  
33  
34  
35  
36  
37  
38  
39  
40  
41  
42  
43  
44  
45  
46  
47  
48  
49  
50  
51  
52  
53  
54  
55  
56  
57  
58  
59  
60

For review

1  
2  
3  
4  
5  
6 571  
7 572  
8  
9 573  
10 574  
11

Table 1. Soil physicochemical properties of the paddy field

| pH(H <sub>2</sub> O) | EC<br>(mS m <sup>-1</sup> ) | TC<br>(g kg <sup>-1</sup> ) | TN   | C/N   | Soil texture (%) |      |      |
|----------------------|-----------------------------|-----------------------------|------|-------|------------------|------|------|
|                      |                             |                             |      |       | sand             | silt | clay |
| 5.72                 | 2.59                        | 8.29                        | 0.74 | 11.24 | 77.5             | 18.8 | 3.6  |

18 575  
19 576  
20  
21 577  
22  
23  
24  
25  
26  
27  
28  
29  
30  
31  
32  
33  
34  
35  
36  
37  
38  
39  
40  
41  
42  
43  
44  
45  
46  
47  
48  
49  
50  
51  
52  
53  
54  
55  
56  
57  
58  
59  
60

For review

1  
2  
3  
4  
5  
6 578  
7 579  
8  
9 580  
10 581  
11 582  
12  
13 583  
14

Table 2. Yields and chemical properties of each GM

|   | Yields | TC   | TN    | CN ratio |
|---|--------|------|-------|----------|
|   | t/ha   | t/ha | t/ha  |          |
| V | 1.24   | 0.53 | 0.045 | 11.8     |
| A | 1.31   | 0.61 | 0.01  | 61.0     |
| M | 2.55   | 0.9  | 0.03  | 30.0     |

15  
16  
17  
18  
19  
20  
21  
22  
23  
24  
25  
26  
27  
28 584  
29 585  
30  
31  
32  
33  
34  
35  
36  
37  
38  
39  
40  
41  
42  
43  
44  
45  
46  
47  
48  
49  
50  
51  
52  
53  
54  
55  
56  
57  
58  
59  
60

review

1  
2  
3  
4  
5  
6 586  
7 587  
8  
9 588  
10 589  
11  
12 590  
13 591  
14  
15  
16  
17  
18  
19  
20  
21  
22  
23  
24  
25  
26  
27  
28  
29 592  
30  
31 593  
32  
33 594  
34 595  
35  
36  
37  
38  
39  
40  
41  
42  
43  
44  
45  
46  
47  
48  
49  
50  
51  
52  
53  
54  
55  
56  
57  
58  
59  
60

Table 3. Inputs of GM in the litter bag

|   | Input amount<br>mg litter bag <sup>-1</sup> | Input carbon<br>contents<br>(mg kg <sup>-1</sup> ) | Input nitrogen<br>contents<br>(mg kg <sup>-1</sup> ) |
|---|---------------------------------------------|----------------------------------------------------|------------------------------------------------------|
| C | 0                                           | 0                                                  | 0                                                    |
| V | 37.2                                        | 500                                                | 42.3                                                 |
| A | 39.3                                        | 500                                                | 8.3                                                  |
| M | 76.5                                        | 1000                                               | 50.7                                                 |

596

Table 4. Soil chemical and microbial properties after the harvesting stage

|   | TC        | TN        | Cellulose | Hemicellulose | Microbial biomass C | beta-glucosidase | Dehydrogenase | OTU number | Shannon index |
|---|-----------|-----------|-----------|---------------|---------------------|------------------|---------------|------------|---------------|
| C | 5.52±0.39 | 0.43±0.03 | 238±17    | 391±18        | 27.3±16.5           | 0.09±0.02        | 0.27±0.17     | 1271±323   | 6.39±0.45     |
| V | 5.84±0.36 | 0.48±0.04 | 226±32    | 397±6         | 28.1±14.5           | 0.11±0.08        | 0.35±0.01     | 1893±389   | 7.03±0.25     |
| A | 5.61±0.88 | 0.49±0.06 | 222±49    | 370±38        | 25.5±17.8           | 0.16±0.04        | 0.41±0.15     | 1334±375   | 6.37±0.31     |
| M | 6.66±0.66 | 0.56±0.06 | 282±51    | 422±30        | 24.9±4.4            | 0.15±0.04        | 0.48±0.2      | 838±125*   | 5.69±0.19*    |

597  
598

Table 5. Correlations between each microbes and cellulose, hemicellulose, and soil carbon content

| Phylum         | Closest relatives               | Cellulose             | Hemicellulose | Total Carbon |
|----------------|---------------------------------|-----------------------|---------------|--------------|
| Firmicutes     | <i>Lachnospiraceae</i>          | 0.606                 | 0.679         | 0.242        |
|                | <i>Clostridiales</i>            | 0.46                  | 0.401         | 0.203        |
|                | <i>Bacillus</i>                 | 0.261                 | 0.285         | 0.759        |
| Chloroflexi    | <i>Anaerolineae SJA15</i>       | -0.474                | -0.551        | -0.347       |
|                | <i>Ktedonobacteria</i>          | -0.205                | -0.053        | -0.438       |
|                | Unidentified Chloroflexi        | -0.41                 | -0.406        | -0.417       |
| Proteobacteria | <i>Rhizobiales</i>              | -0.457                | -0.292        | -0.757       |
|                | Unidentified Betaproteobacteria | -0.394                | -0.45         | -0.173       |
|                | Verrucomicrobia                 | <i>Pedosphaerales</i> | -0.373        | -0.404       |
| Chlorobi       | <i>BSV26</i>                    | -0.277                | -0.496        | -0.401       |
| Euryarchaeota  | <i>Methanomicrobia</i>          | -0.097                | -0.435        | -0.219       |

600

601

For review

1  
2  
3  
4  
5  
6 602  
7 603  
8  
9 604  
10 605  
11

Table 6. Correlations between each microbes and, hemicellulose contents in each treatment

| Pylum          | Closest relatives         | A     | E     | M     |
|----------------|---------------------------|-------|-------|-------|
| Firmicutes     | <i>Bacillus</i>           | 0.46  | 0.50  | 0.45  |
|                | <i>Lachnospiraceae</i>    | -0.08 | 0.45  | 0.41  |
|                | <i>Ruminococcaceae</i>    | 0.32  | -0.43 | 0.24  |
| Chloroflexi    | <i>Anaerolineae</i>       | -0.41 | -0.42 | -0.01 |
|                | Unidntified Chloroflexi   | -0.49 | 0.05  | -0.37 |
| Proteobacteria | <i>Desulfobulbaceae</i>   | 0.01  | -0.44 | -0.10 |
|                | <i>Betaproteobacteria</i> | 0.06  | -0.42 | -0.25 |
| Chlorobi       | BSCV6                     | 0.22  | -0.49 | -0.21 |
| Euryarchaeota  | <i>Methanomicrobia</i>    | 0.05  | -0.23 | -0.41 |
|                | <i>Methanoregulaceae</i>  | -0.02 | -0.05 | -0.45 |

25 606  
26 607  
27  
28  
29  
30  
31  
32  
33  
34  
35  
36  
37  
38  
39  
40  
41  
42  
43  
44  
45  
46  
47  
48  
49  
50  
51  
52  
53  
54  
55  
56  
57  
58  
59  
60



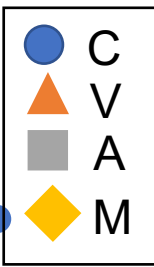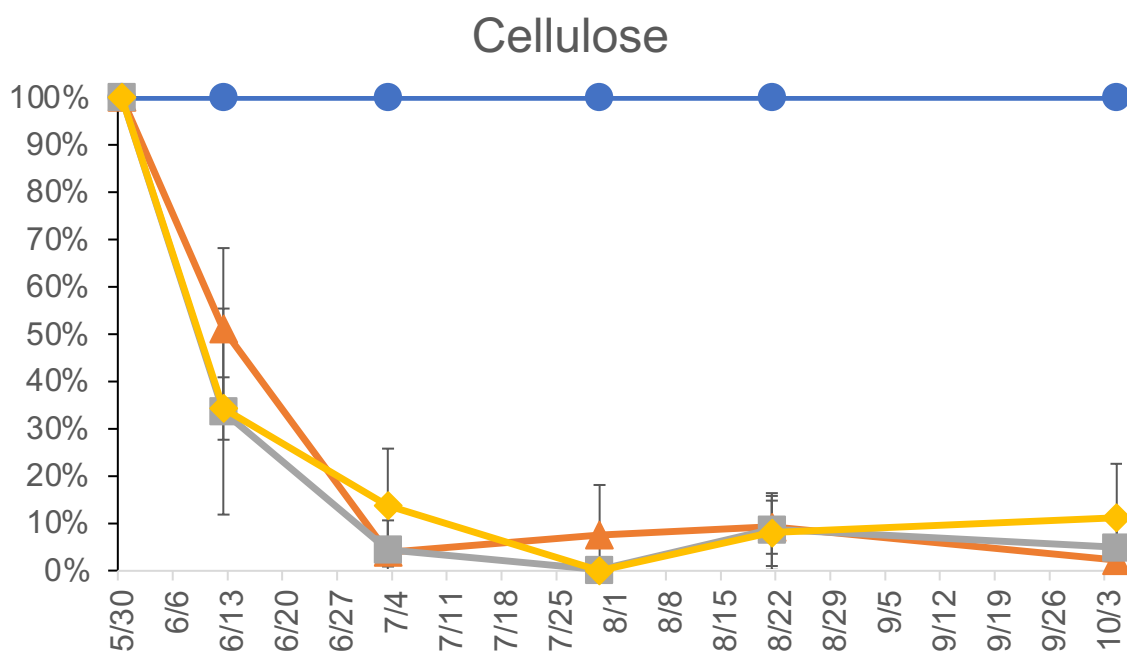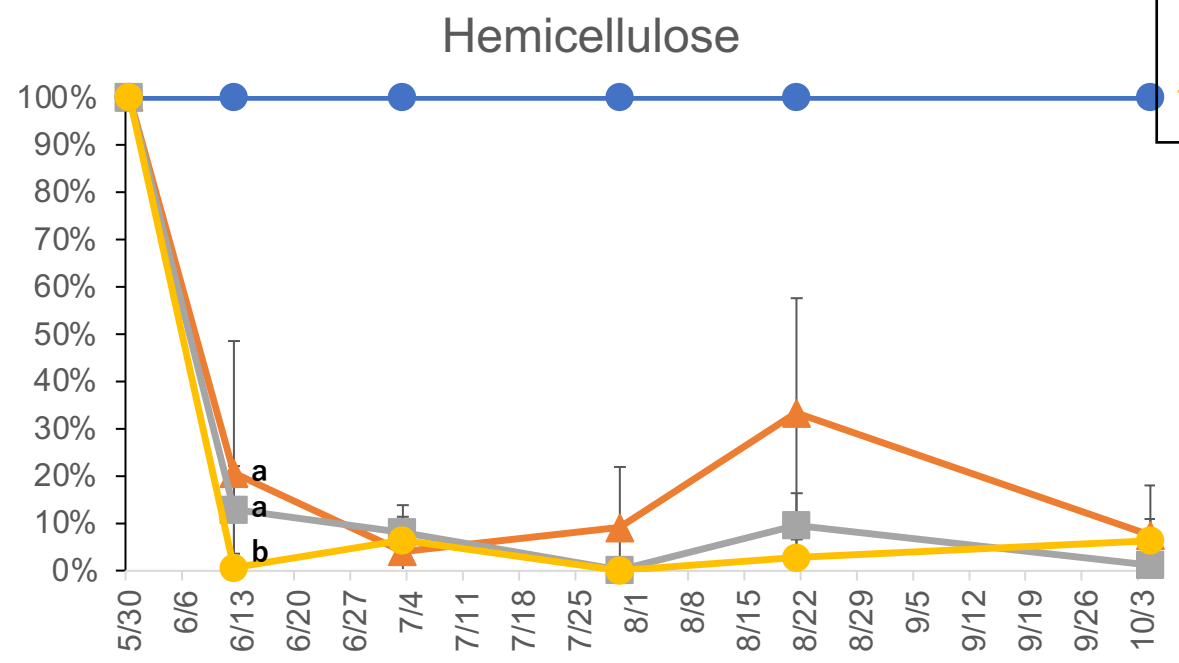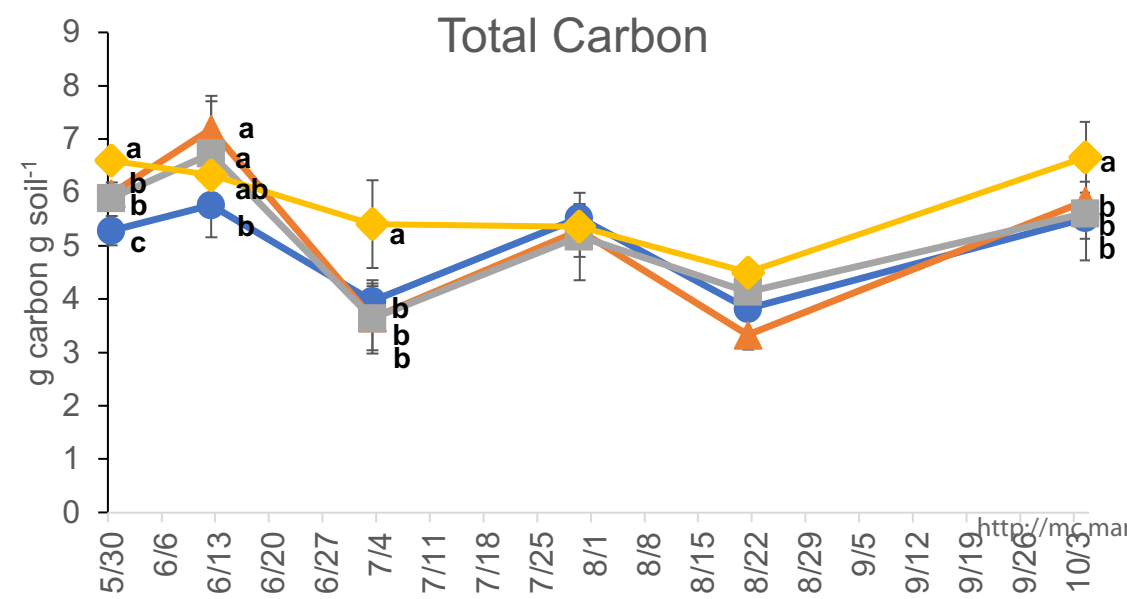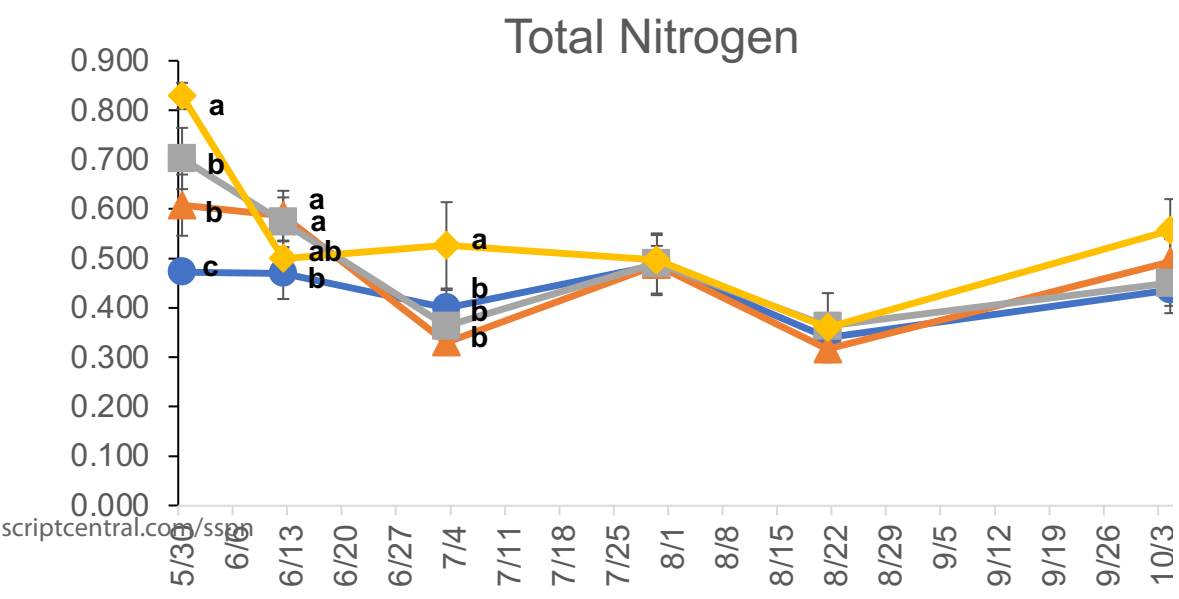

Microbial biomass carbon

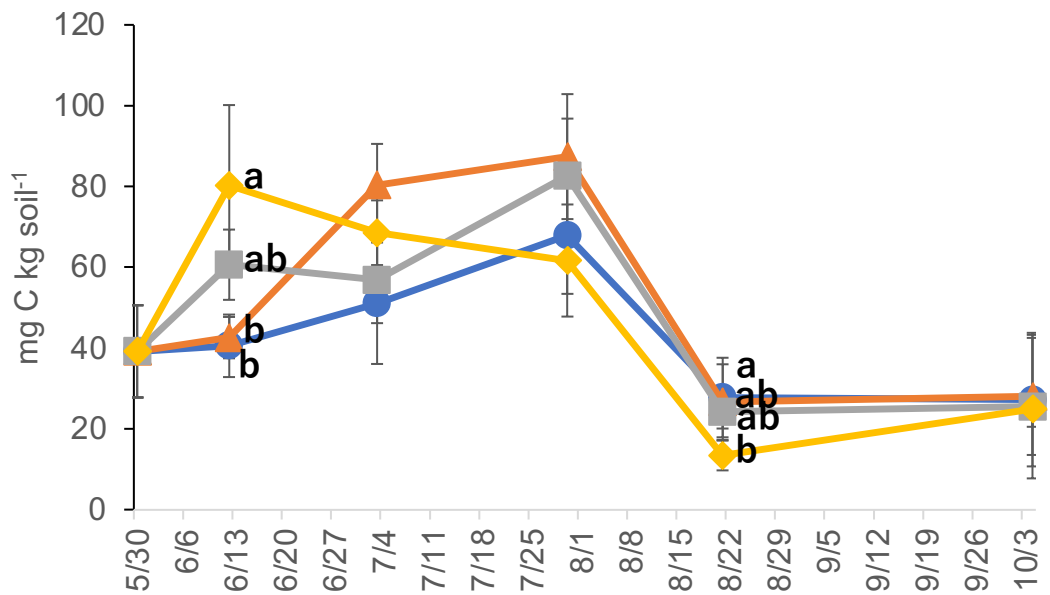

Dehydrogenase activities

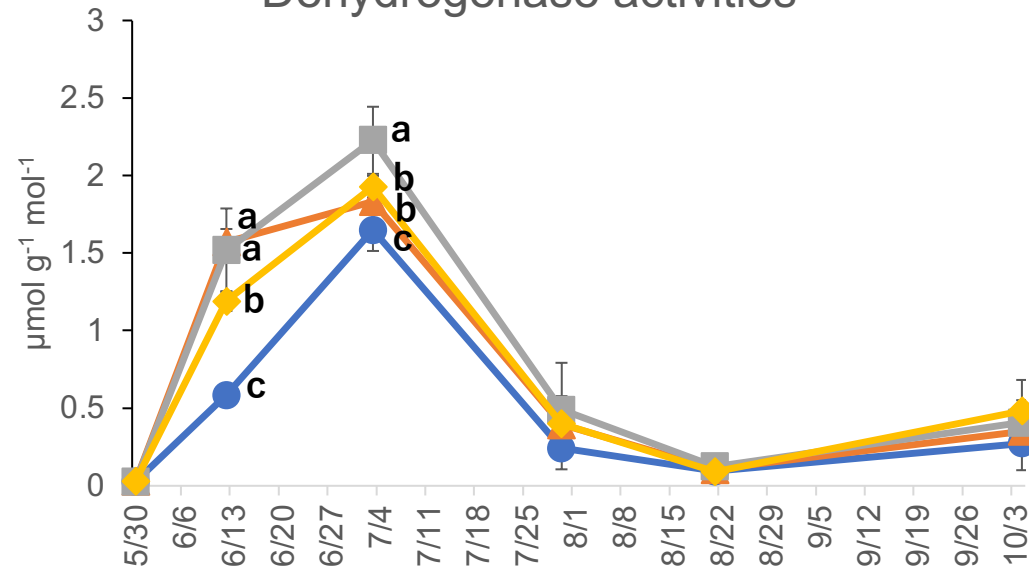

Beta-glucosidase activities

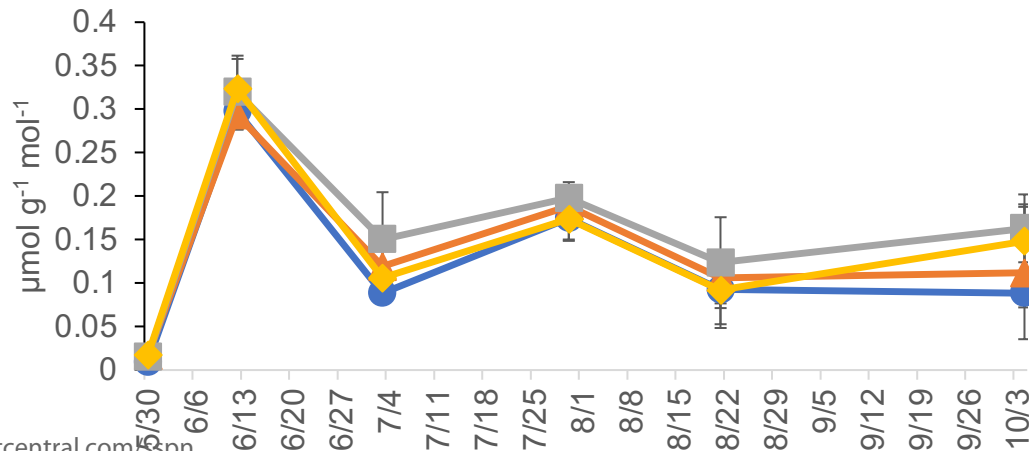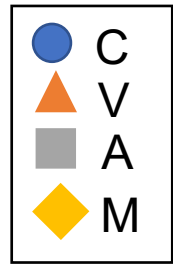

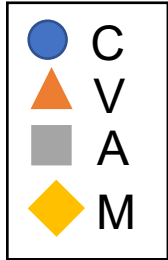

OTU number

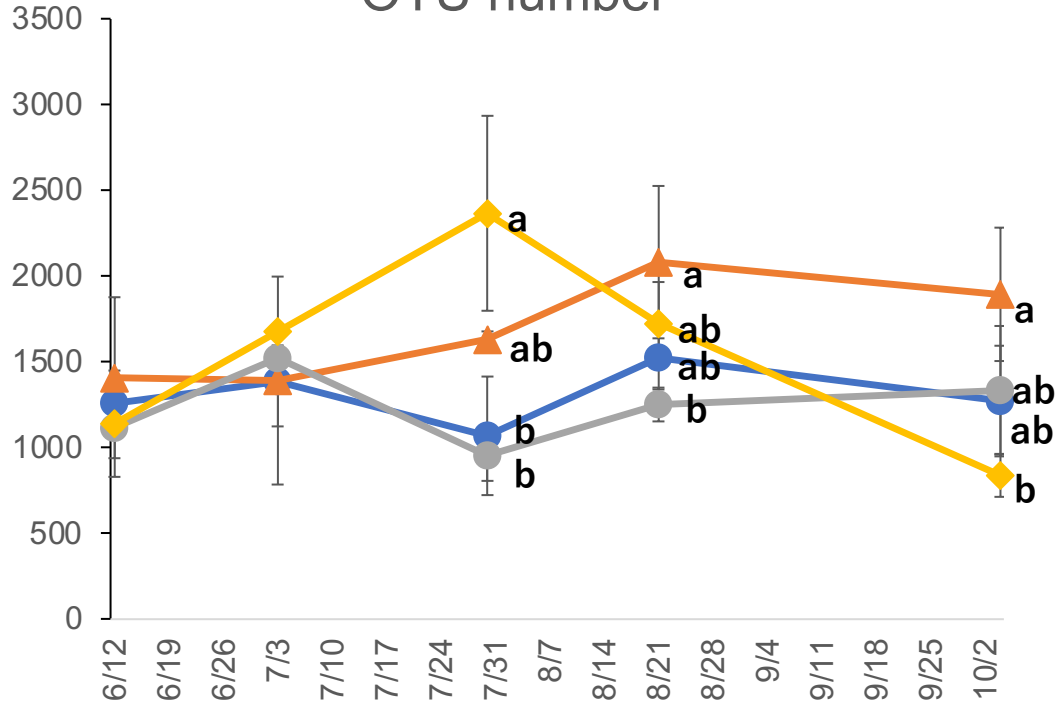

Shannon index

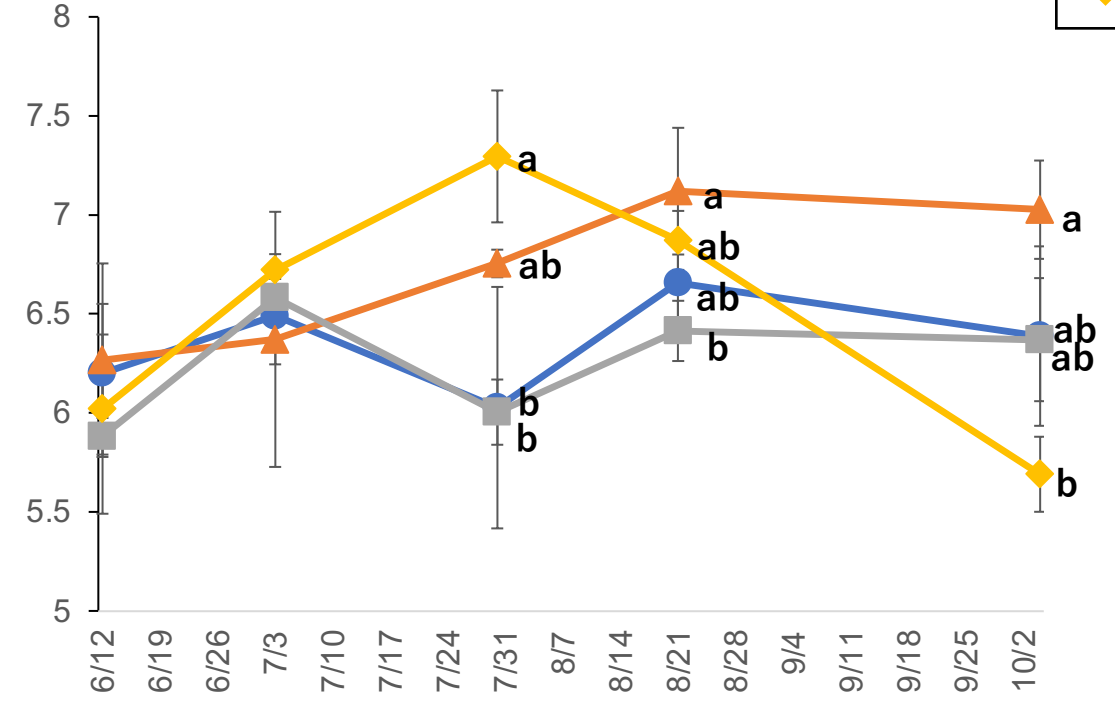



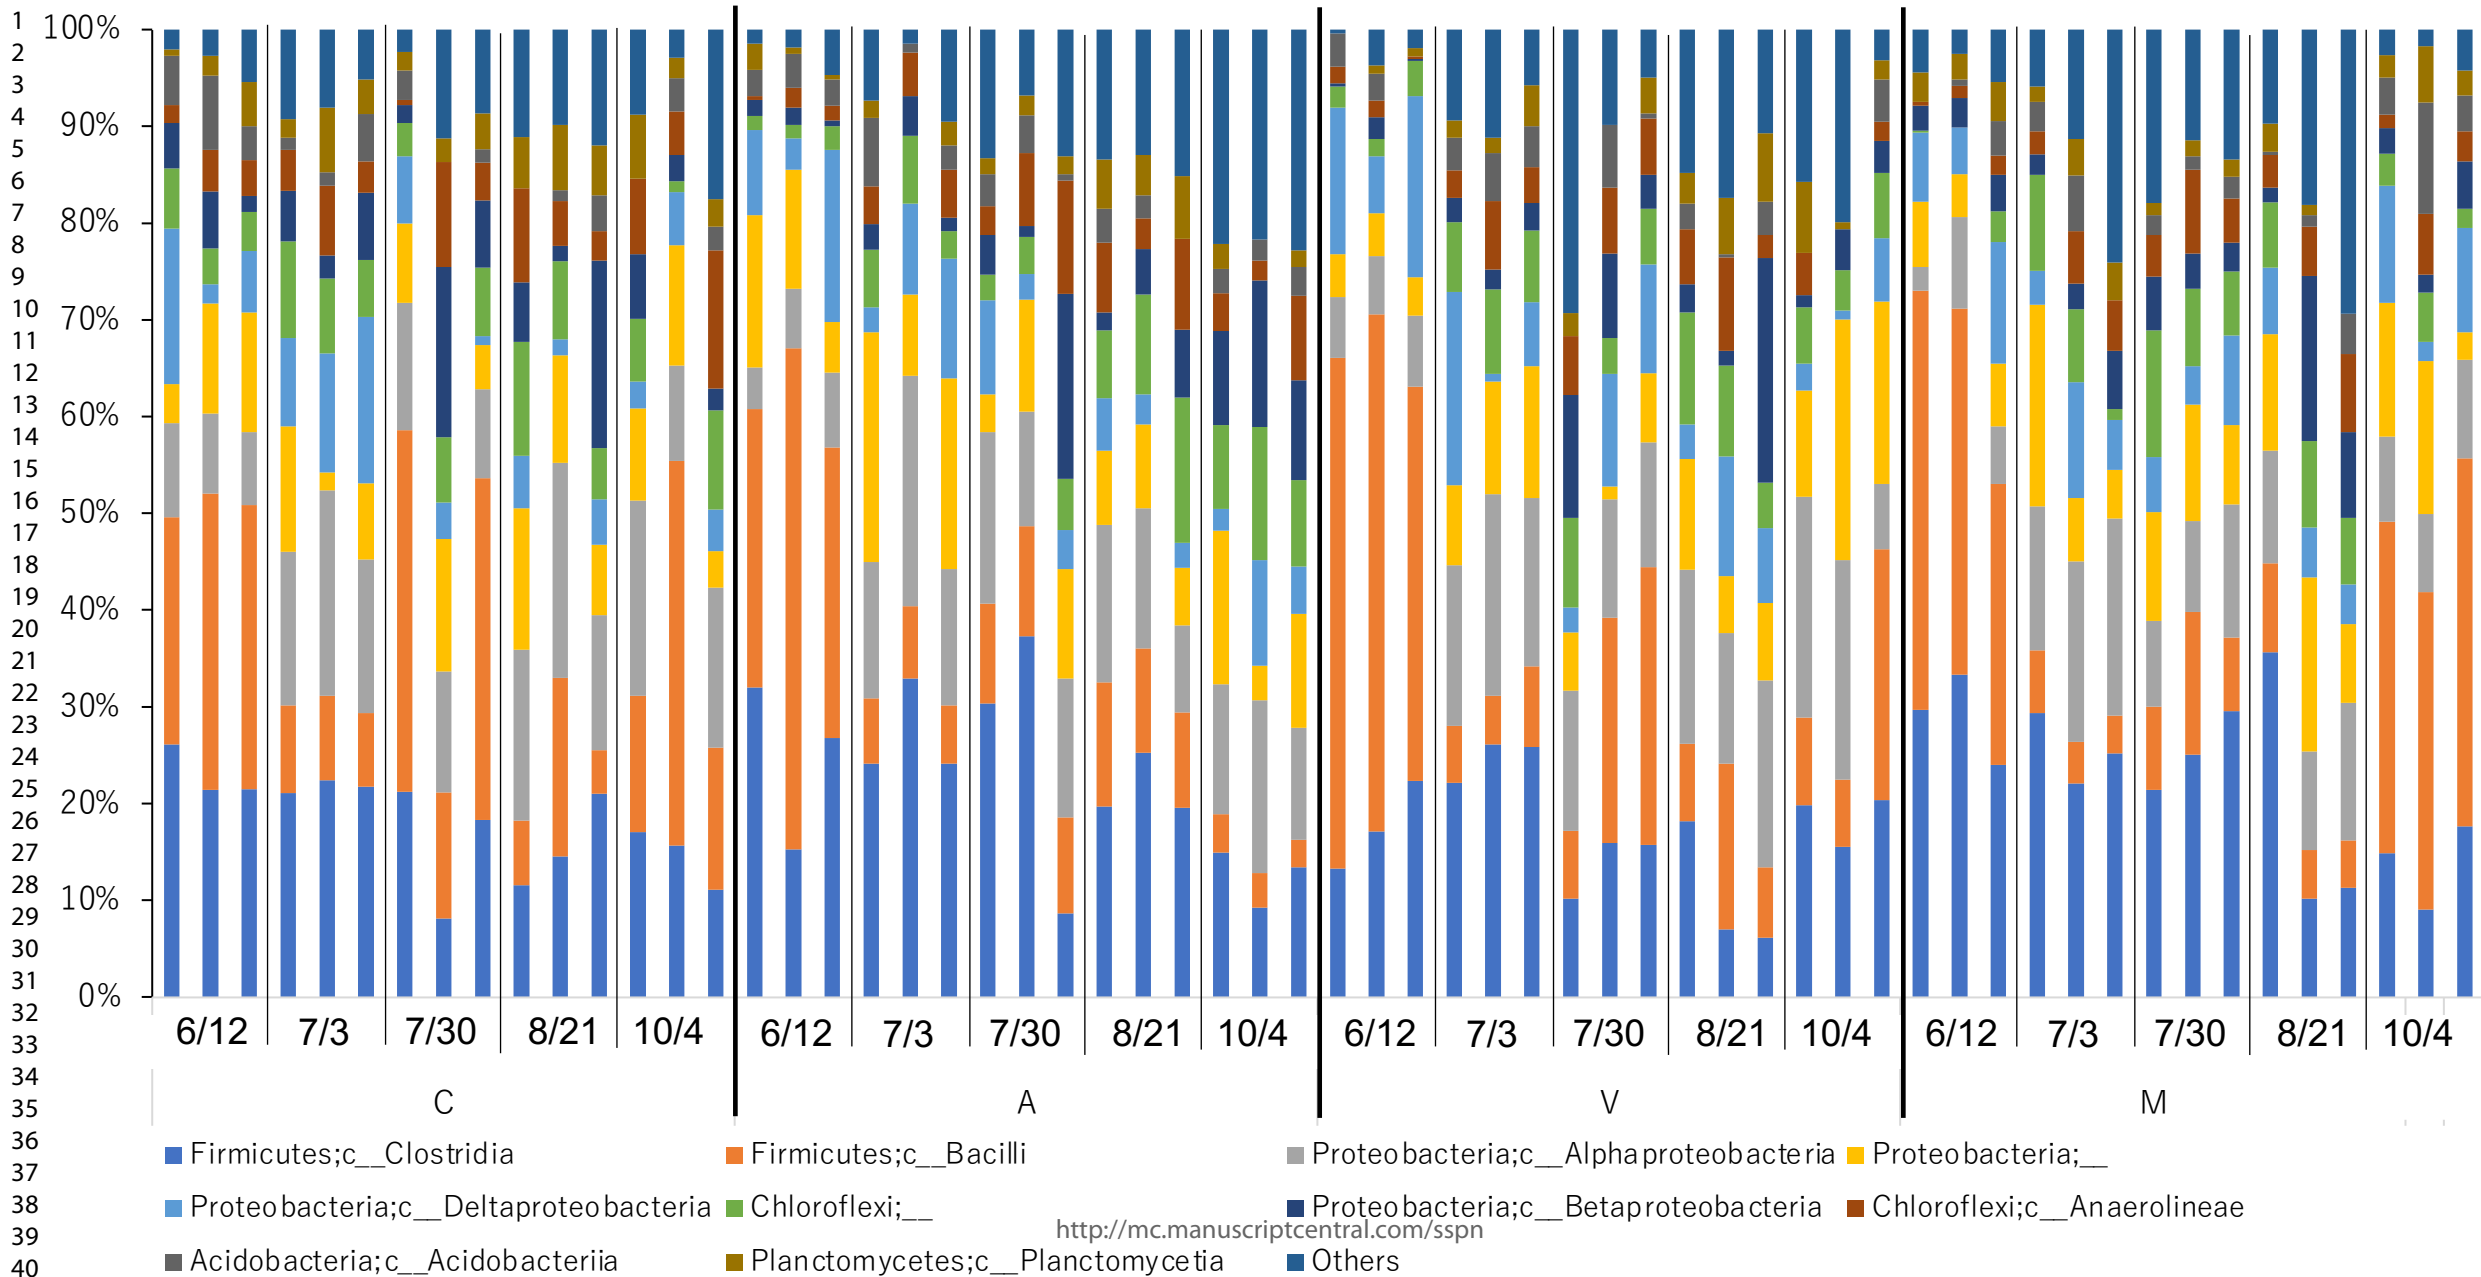

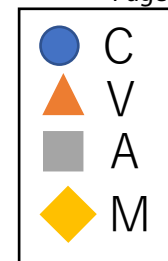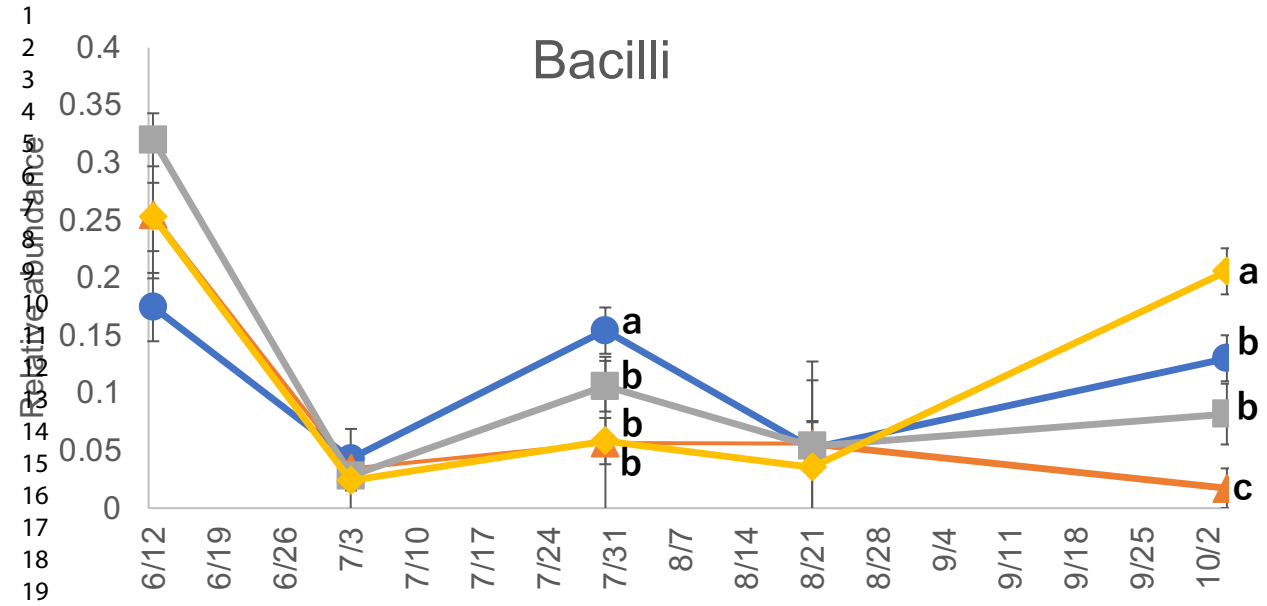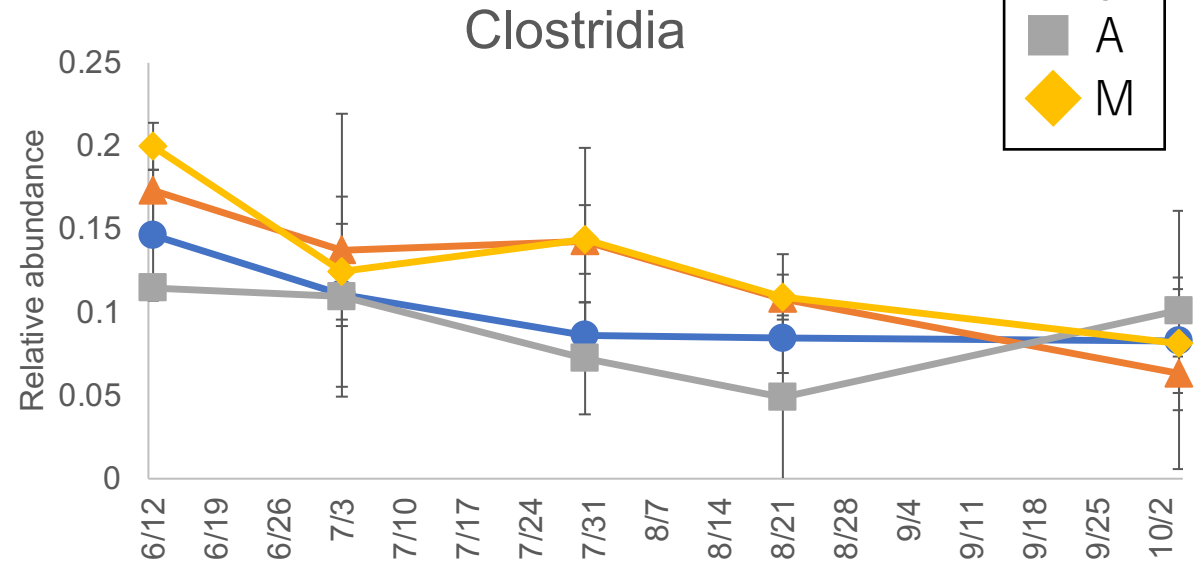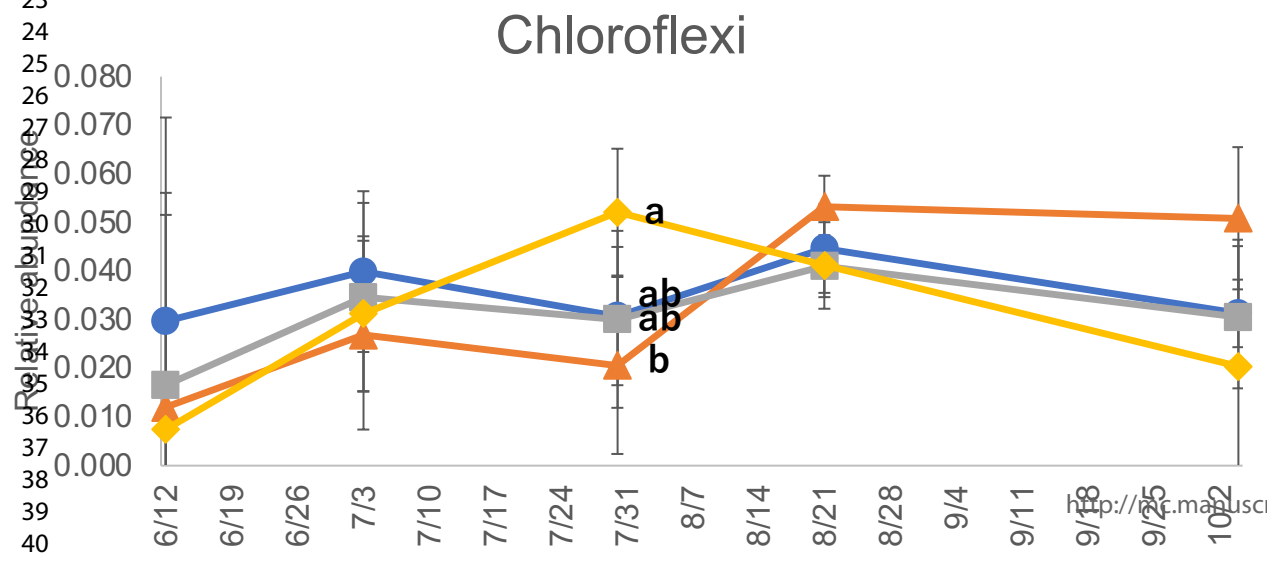

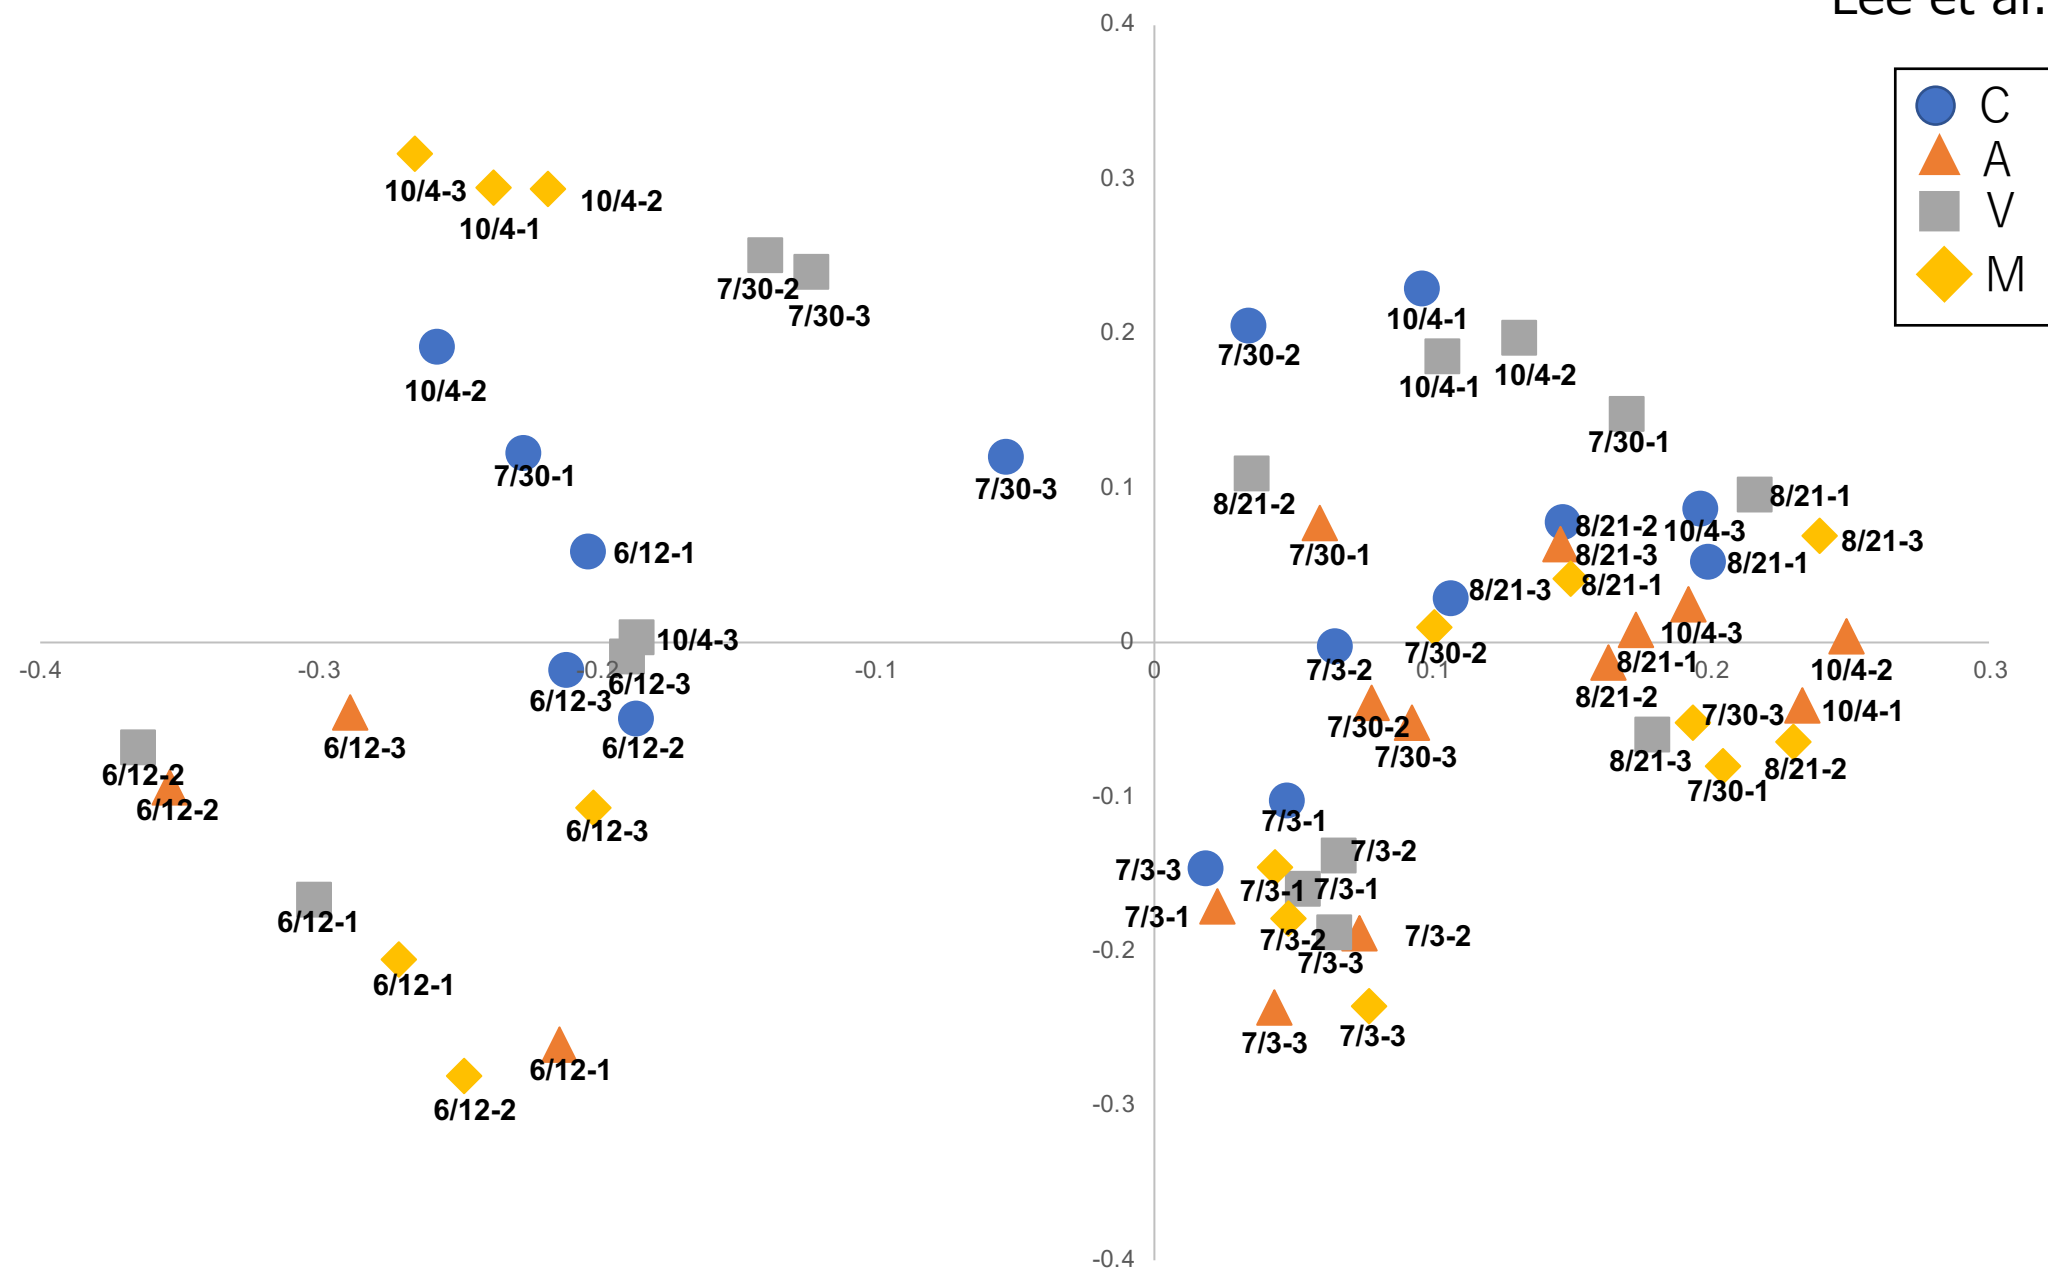

1  
2  
3  
4  
5  
6  
7  
8  
9  
10  
11  
12  
13  
14  
15  
16  
17  
18  
19  
20  
21  
22  
23  
24  
25  
26  
27  
28  
29  
30  
31  
32  
33  
34  
35  
36  
37  
38  
39  
40  
41

## Supplemental Figure 1. Changing the soil carbon content in the paddy field

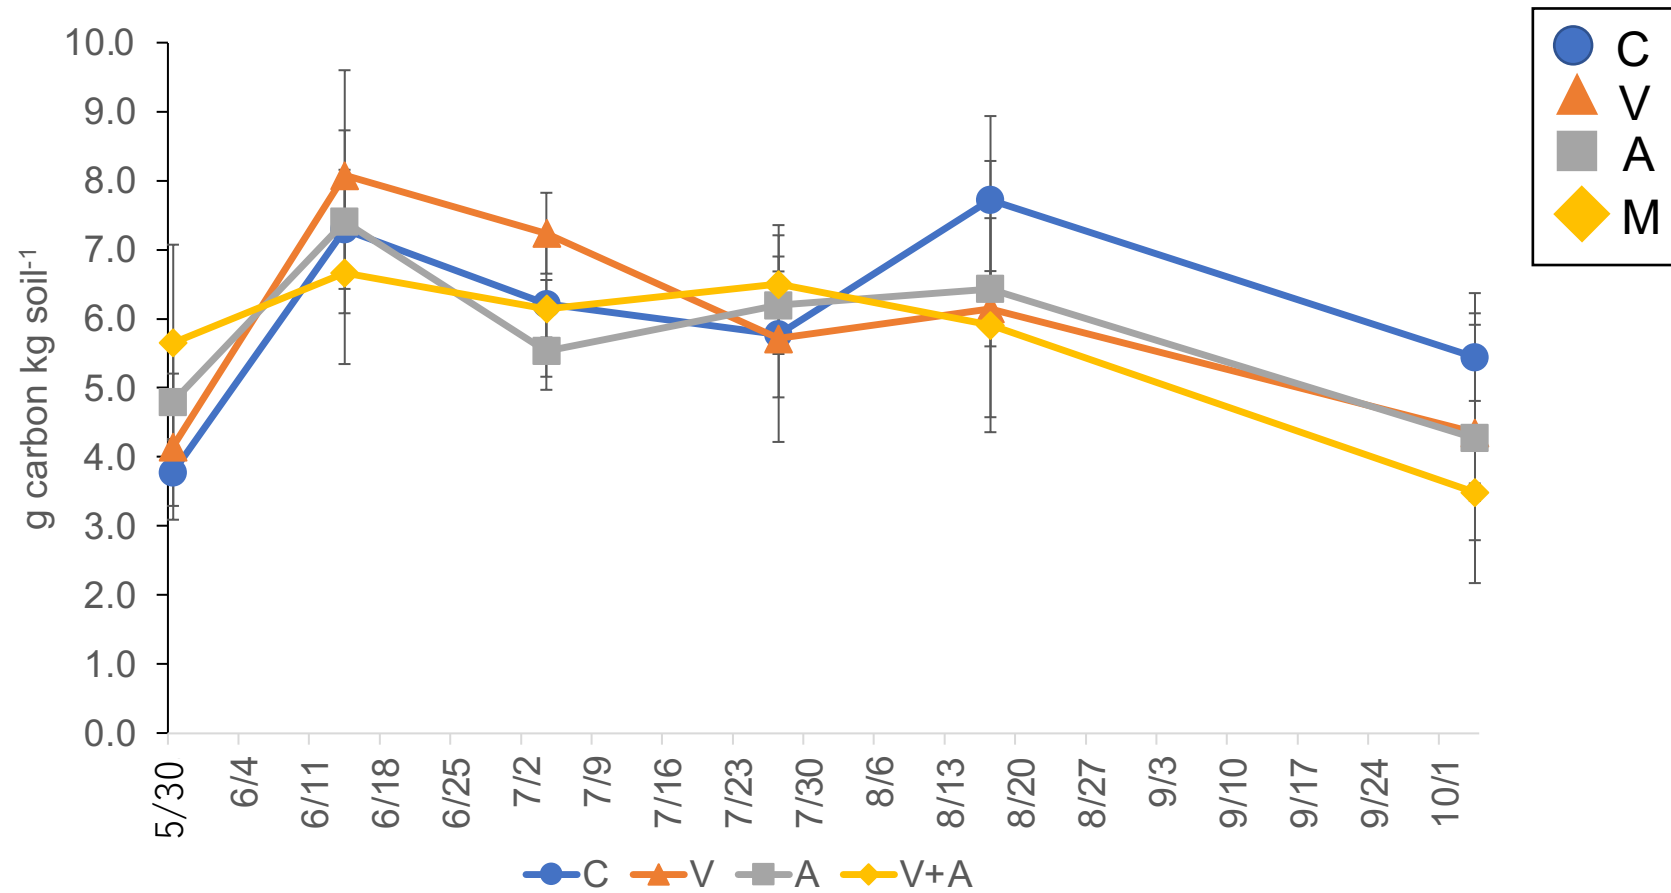

Source: https://biorxiv.org/content/10.1101/2021.03.22.436377v1.full.pdf
